# Supplementary material for: Gradient Copolymerization towards High-performance Monocomponent Polymers for Energy and Charge Storages
Source: Research Square preprint supplement (doi:10.21203/rs.3.rs-847201/v1), 2021-09-10
Supplement: Supplementary file 1 [file efc9feefafa534c0c3b88e8d.docx]

**Gradient Copolymerization towards High-performance Monocomponent Polymers for Energy and Charge Storages**

Yuanwei Zhu1, Wanlong Lu1, Nan Qiao1, Huize Cui1, Zhipeng Hu1,3, Zichao Shen1, Jinde Yu1, Bo Liu2*, Shuwen Zhang4, Yongjie Nie5, Guochang Li6, Shengtao Li1*, Guanghao Lu1*

**Supplementary information**

**Table S1 |** Copolymerization of ethylene and styrene catalyzed by complex **1** under various initial concentration of styrene.*a*

| copolymer | E  /atm | [St]0  /mol·L–1 | Time  /min | Yield  /g | *f*St  / mol%*b* | *M*n  ×10-4c | PDI*c* |
| --- | --- | --- | --- | --- | --- | --- | --- |
| PESt15 | 1 | 0.20 | 15 | 3.6 | 14.7 | 4.2 | 3.7 |
| PESt37 | 1 | 0.40 | 15 | 4.3 | 36.7 | 32.2 | 1.3 |
| PESt59 | 1 | 1.50 | 9 | 4.7 | 59.2 | 65.2 | 1.6 |

*a***1**: 20 μmol, **1**:[Ph3C][B(C6F5)4]:Al*i*Bu3 = 1:1:2, toluene: 75 mL, temperature: 40 °C. *b* Determined by 1H NMR spectrum in C2D2Cl4 at 110 °C (*f*St = 4*A*ar/(5*A*al + *A*ar)×100%, where *A*ar = area of aromatic protons and *A*al = area of aliphatic protons). *c* Determined by GPC in 1,2,4-trichlorobenzene at 150 °C against polystyrene standard.

Table S2 | Kinetic study of co-polymerization of ethylene and styrene catalyzed by 1.*a*

| Entry | Time  /min | Yield  /g | *f*St  / mol%*b* | *M*n  ×10-4*c* | PDI*c* |
| --- | --- | --- | --- | --- | --- |
| 1 | 2 | 0.60 | 59.7 | 25.1 | 2.6 |
| 2 | 5 | 0.89 | 58.0 | 51.2 | 1.6 |
| 3 | 15 | 1.71 | 50.3 | 56.8 | 1.7 |
| 6 | 40 | 2.08 | 40.8 | 60.5 | 1.7 |

*a*1: 10 μmol, **1**:[Ph3C][B(C6F5)4]:Al*i*Bu3 = 1:1:2, [St]0 = 0.45 /mol·L–1, toluene: 35 mL, ethylene: 1 atm, temperature: 40 °C. *b* Determined by 1H NMR spectrum in C2D2Cl4 at 110 °C (*f*St = 4*A*ar/(5*A*al + *A*ar)×100%, where *A*ar = area of aromatic protons and *A*al = area of aliphatic protons). *c* Determined by GPC in 1,2,4-trichlorobenzene at 150 °C against polystyrene standard.

**Table S3 |** Performance of C12-BTBT/PS and C12-BTBT/PESt OFET on 10 devices

|  | C12-BTBT/PS | C12-BTBT/ PESt15 | C12-BTBT/ PESt37 | C12-BTBT/ PESt59 |
| --- | --- | --- | --- | --- |
| *μ*max | 12.3 | 9.8 | 11.8 | 14.2 |
| *μ*average | 11.2 | 8.7 | 10.1 | 12.8 |
| *I*on/*I*off (average) | 3×106 | 3×105 | 5×105 | 2×106 |
| *V*th-average | -28 | -36 | -33 | -26 |

**
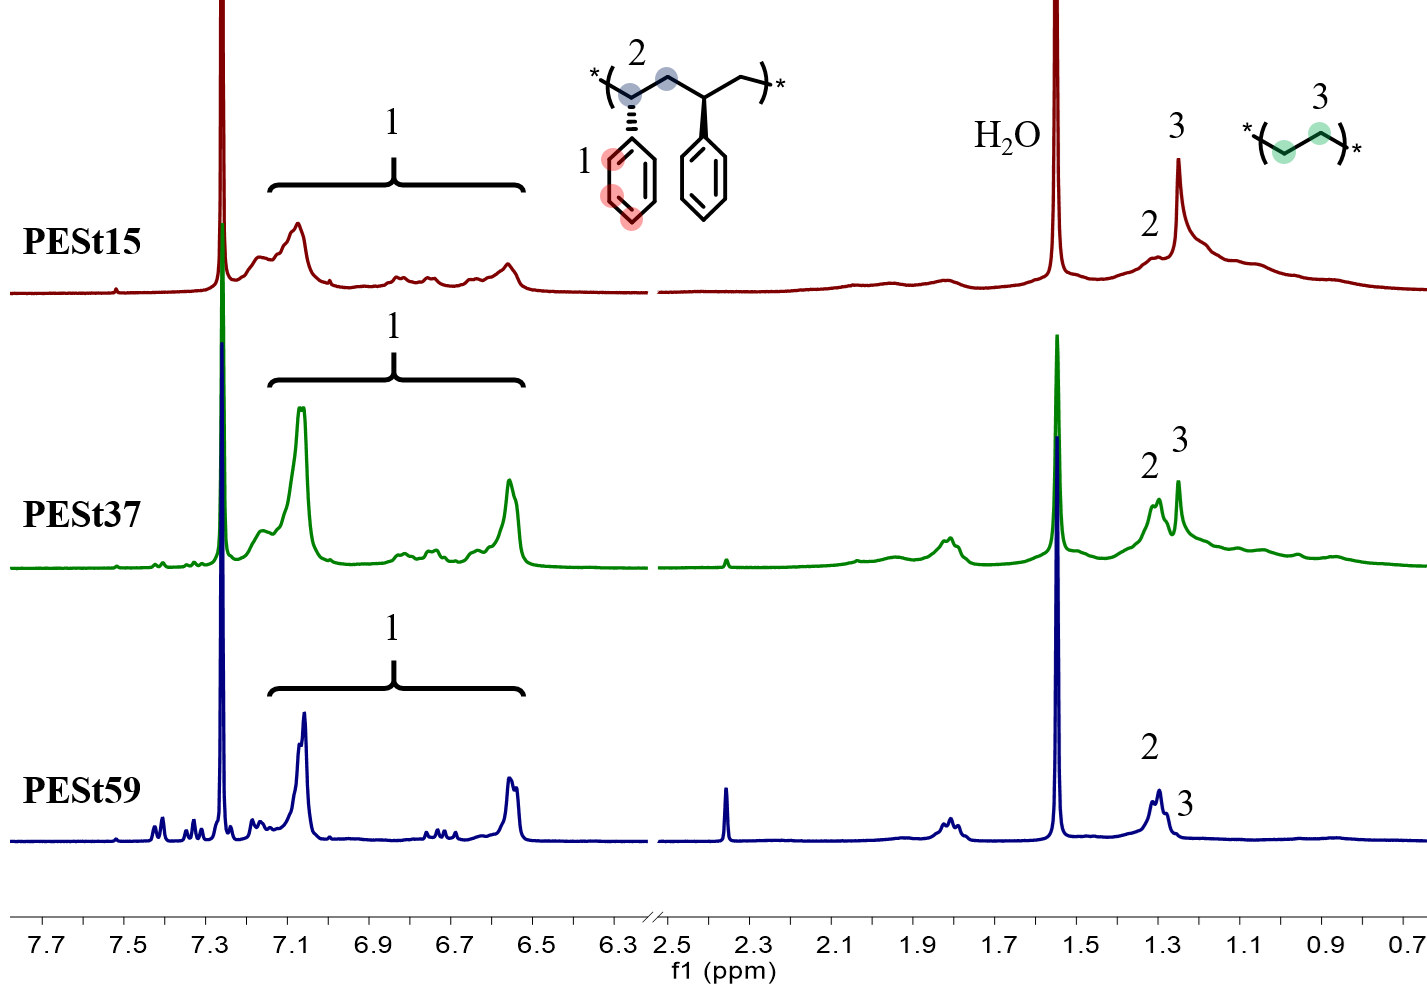
**

**Figure S1 |** The 1H NMR spectra of PESt (PESt15, PESt37 and PESt59).


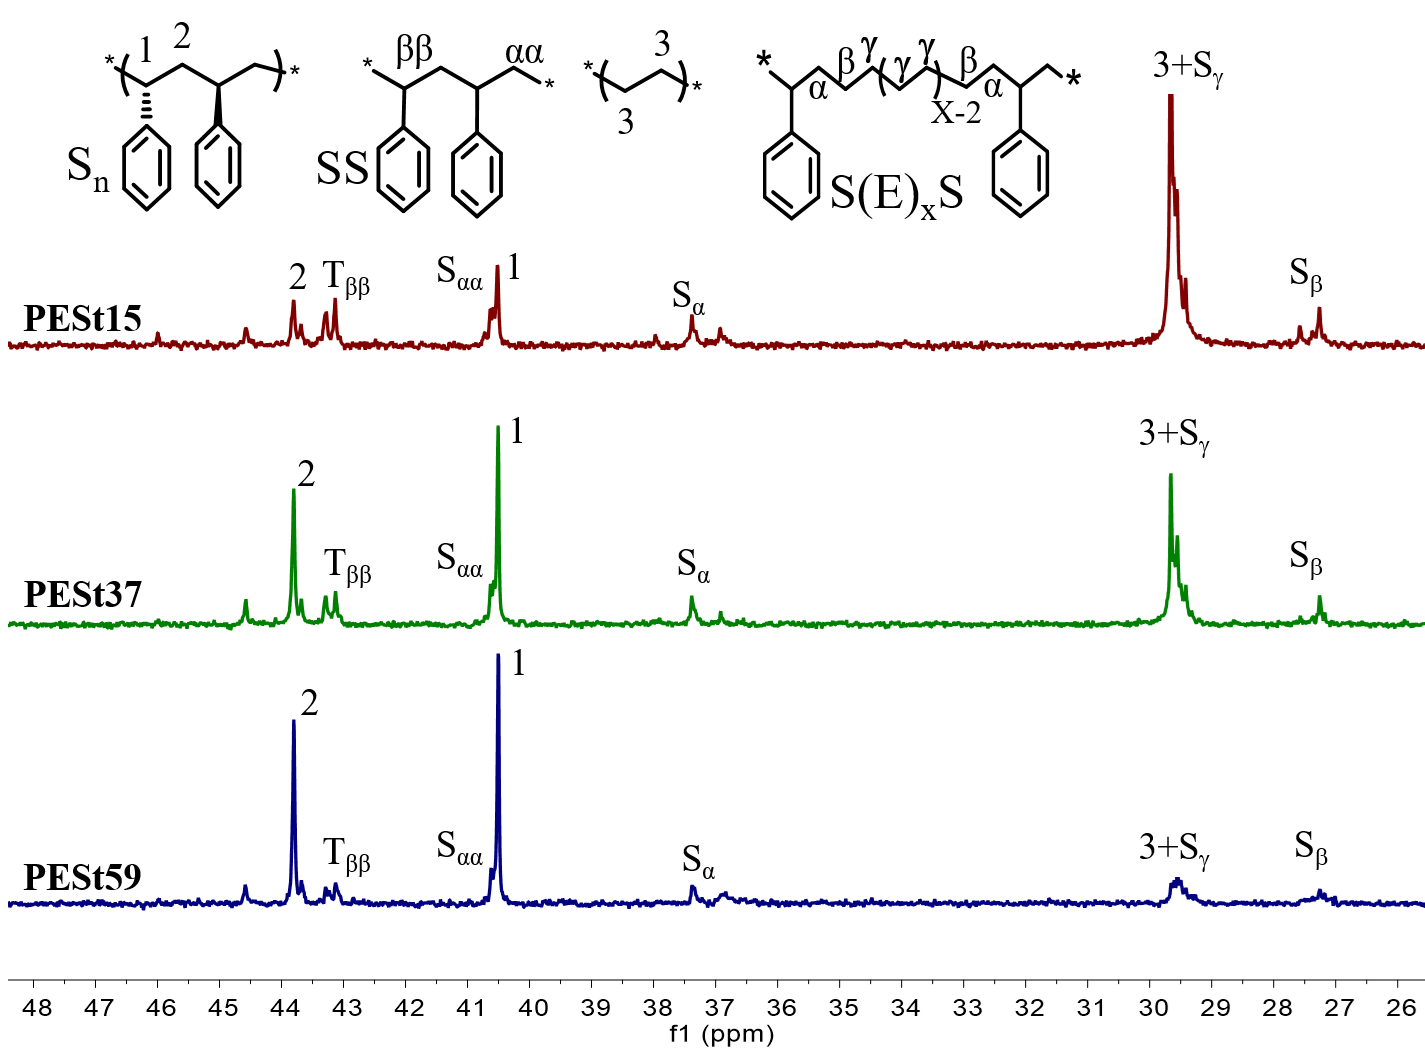


**Figure S2 |** The 13C NMR spectra of PESt (PESt15, PESt37 and PESt59).

**b**

**a**

**
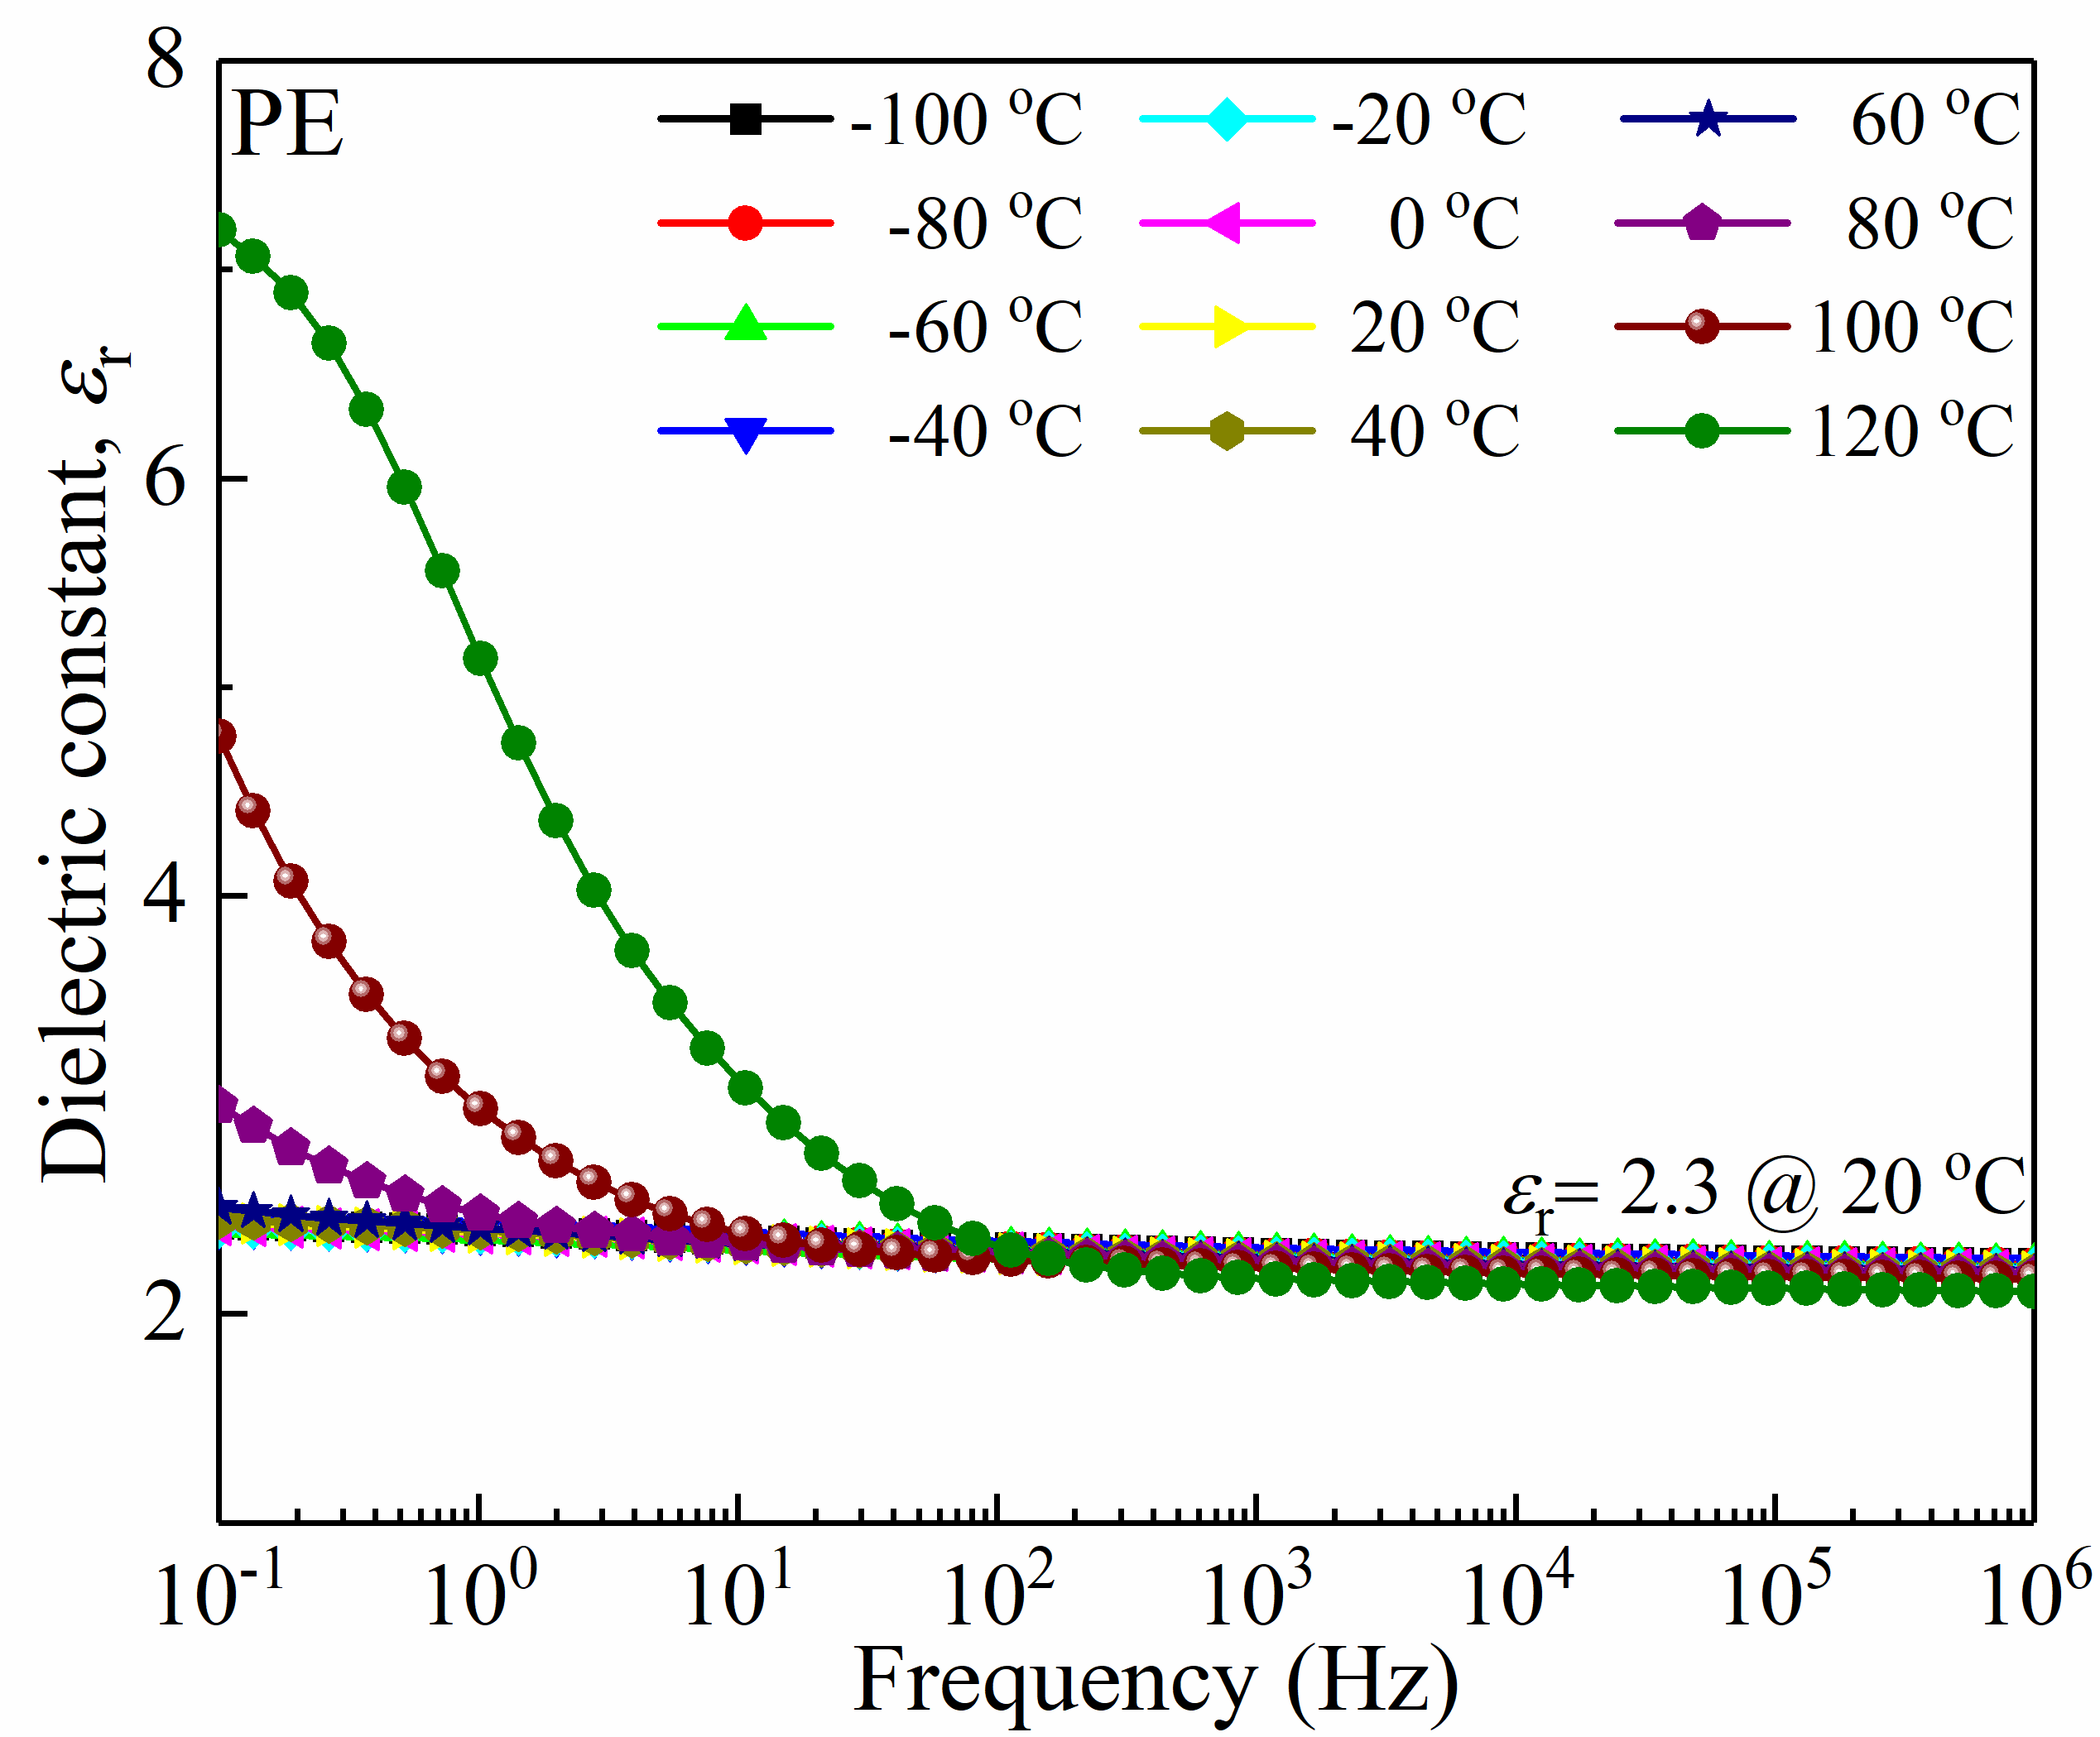

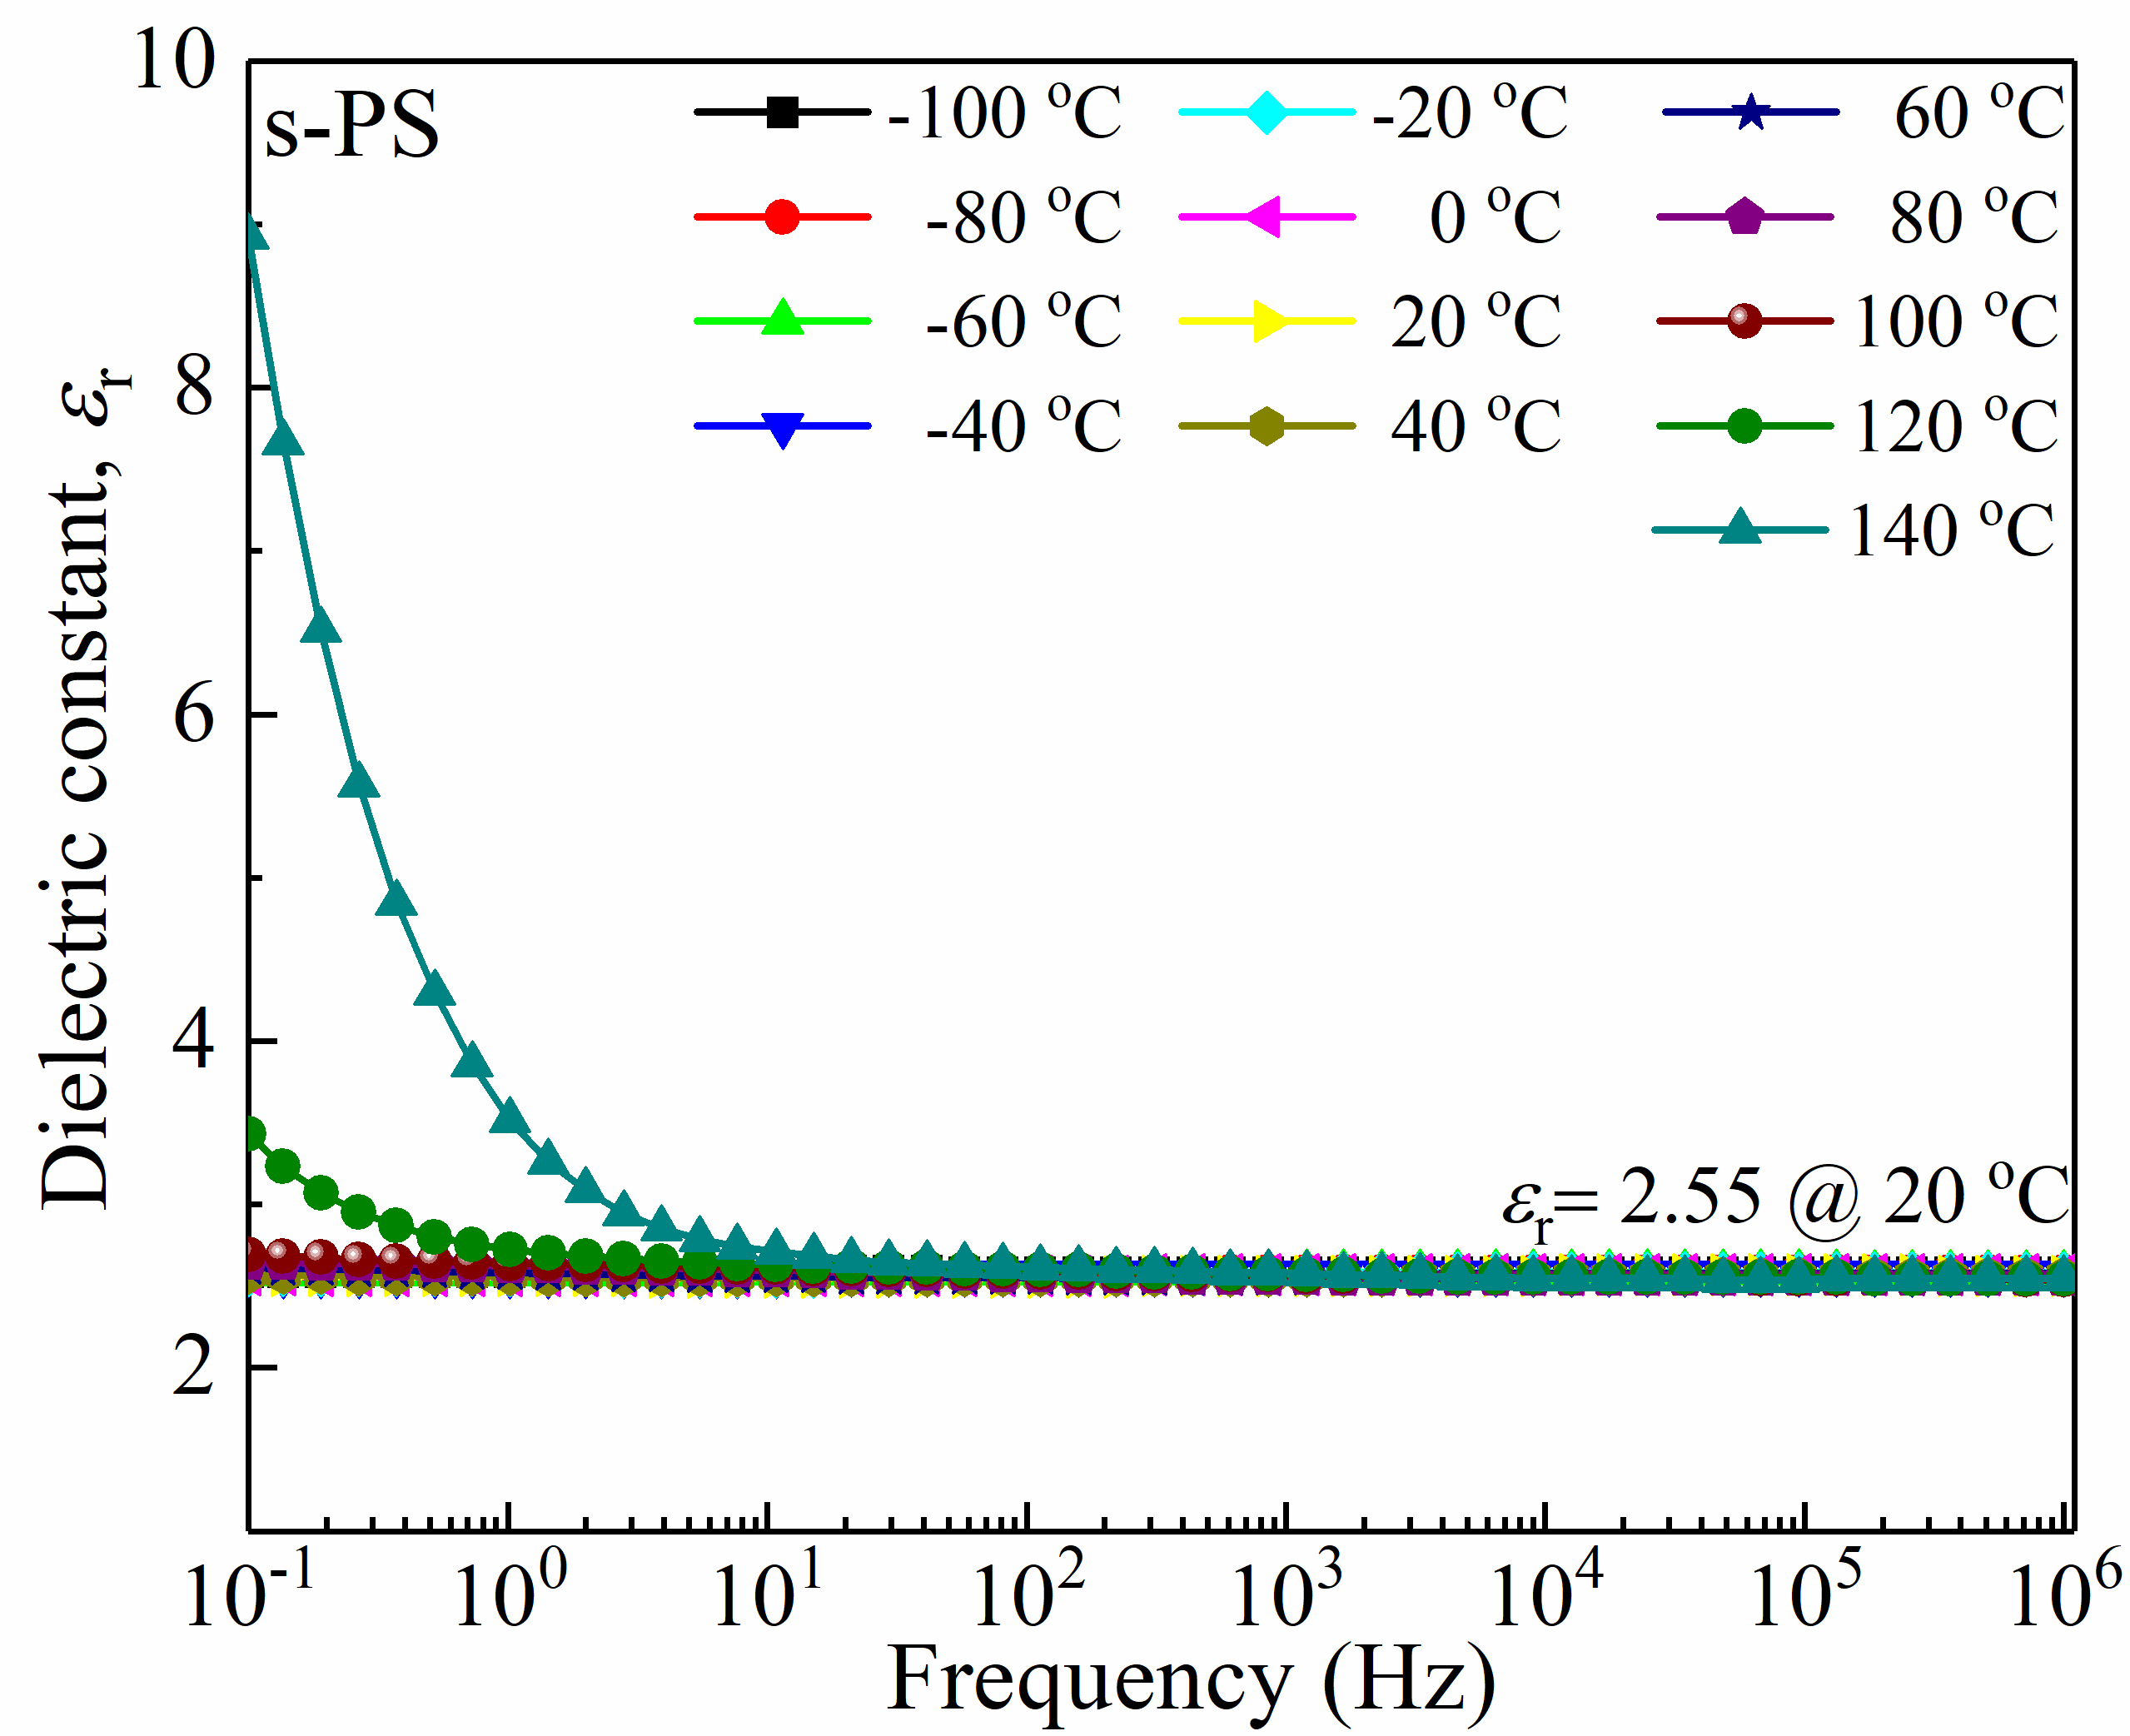
**

**Figure S3 |** Frequency dependent dielectric spectra of a) PE and b) s-PS.

**a**

**c**

**b**


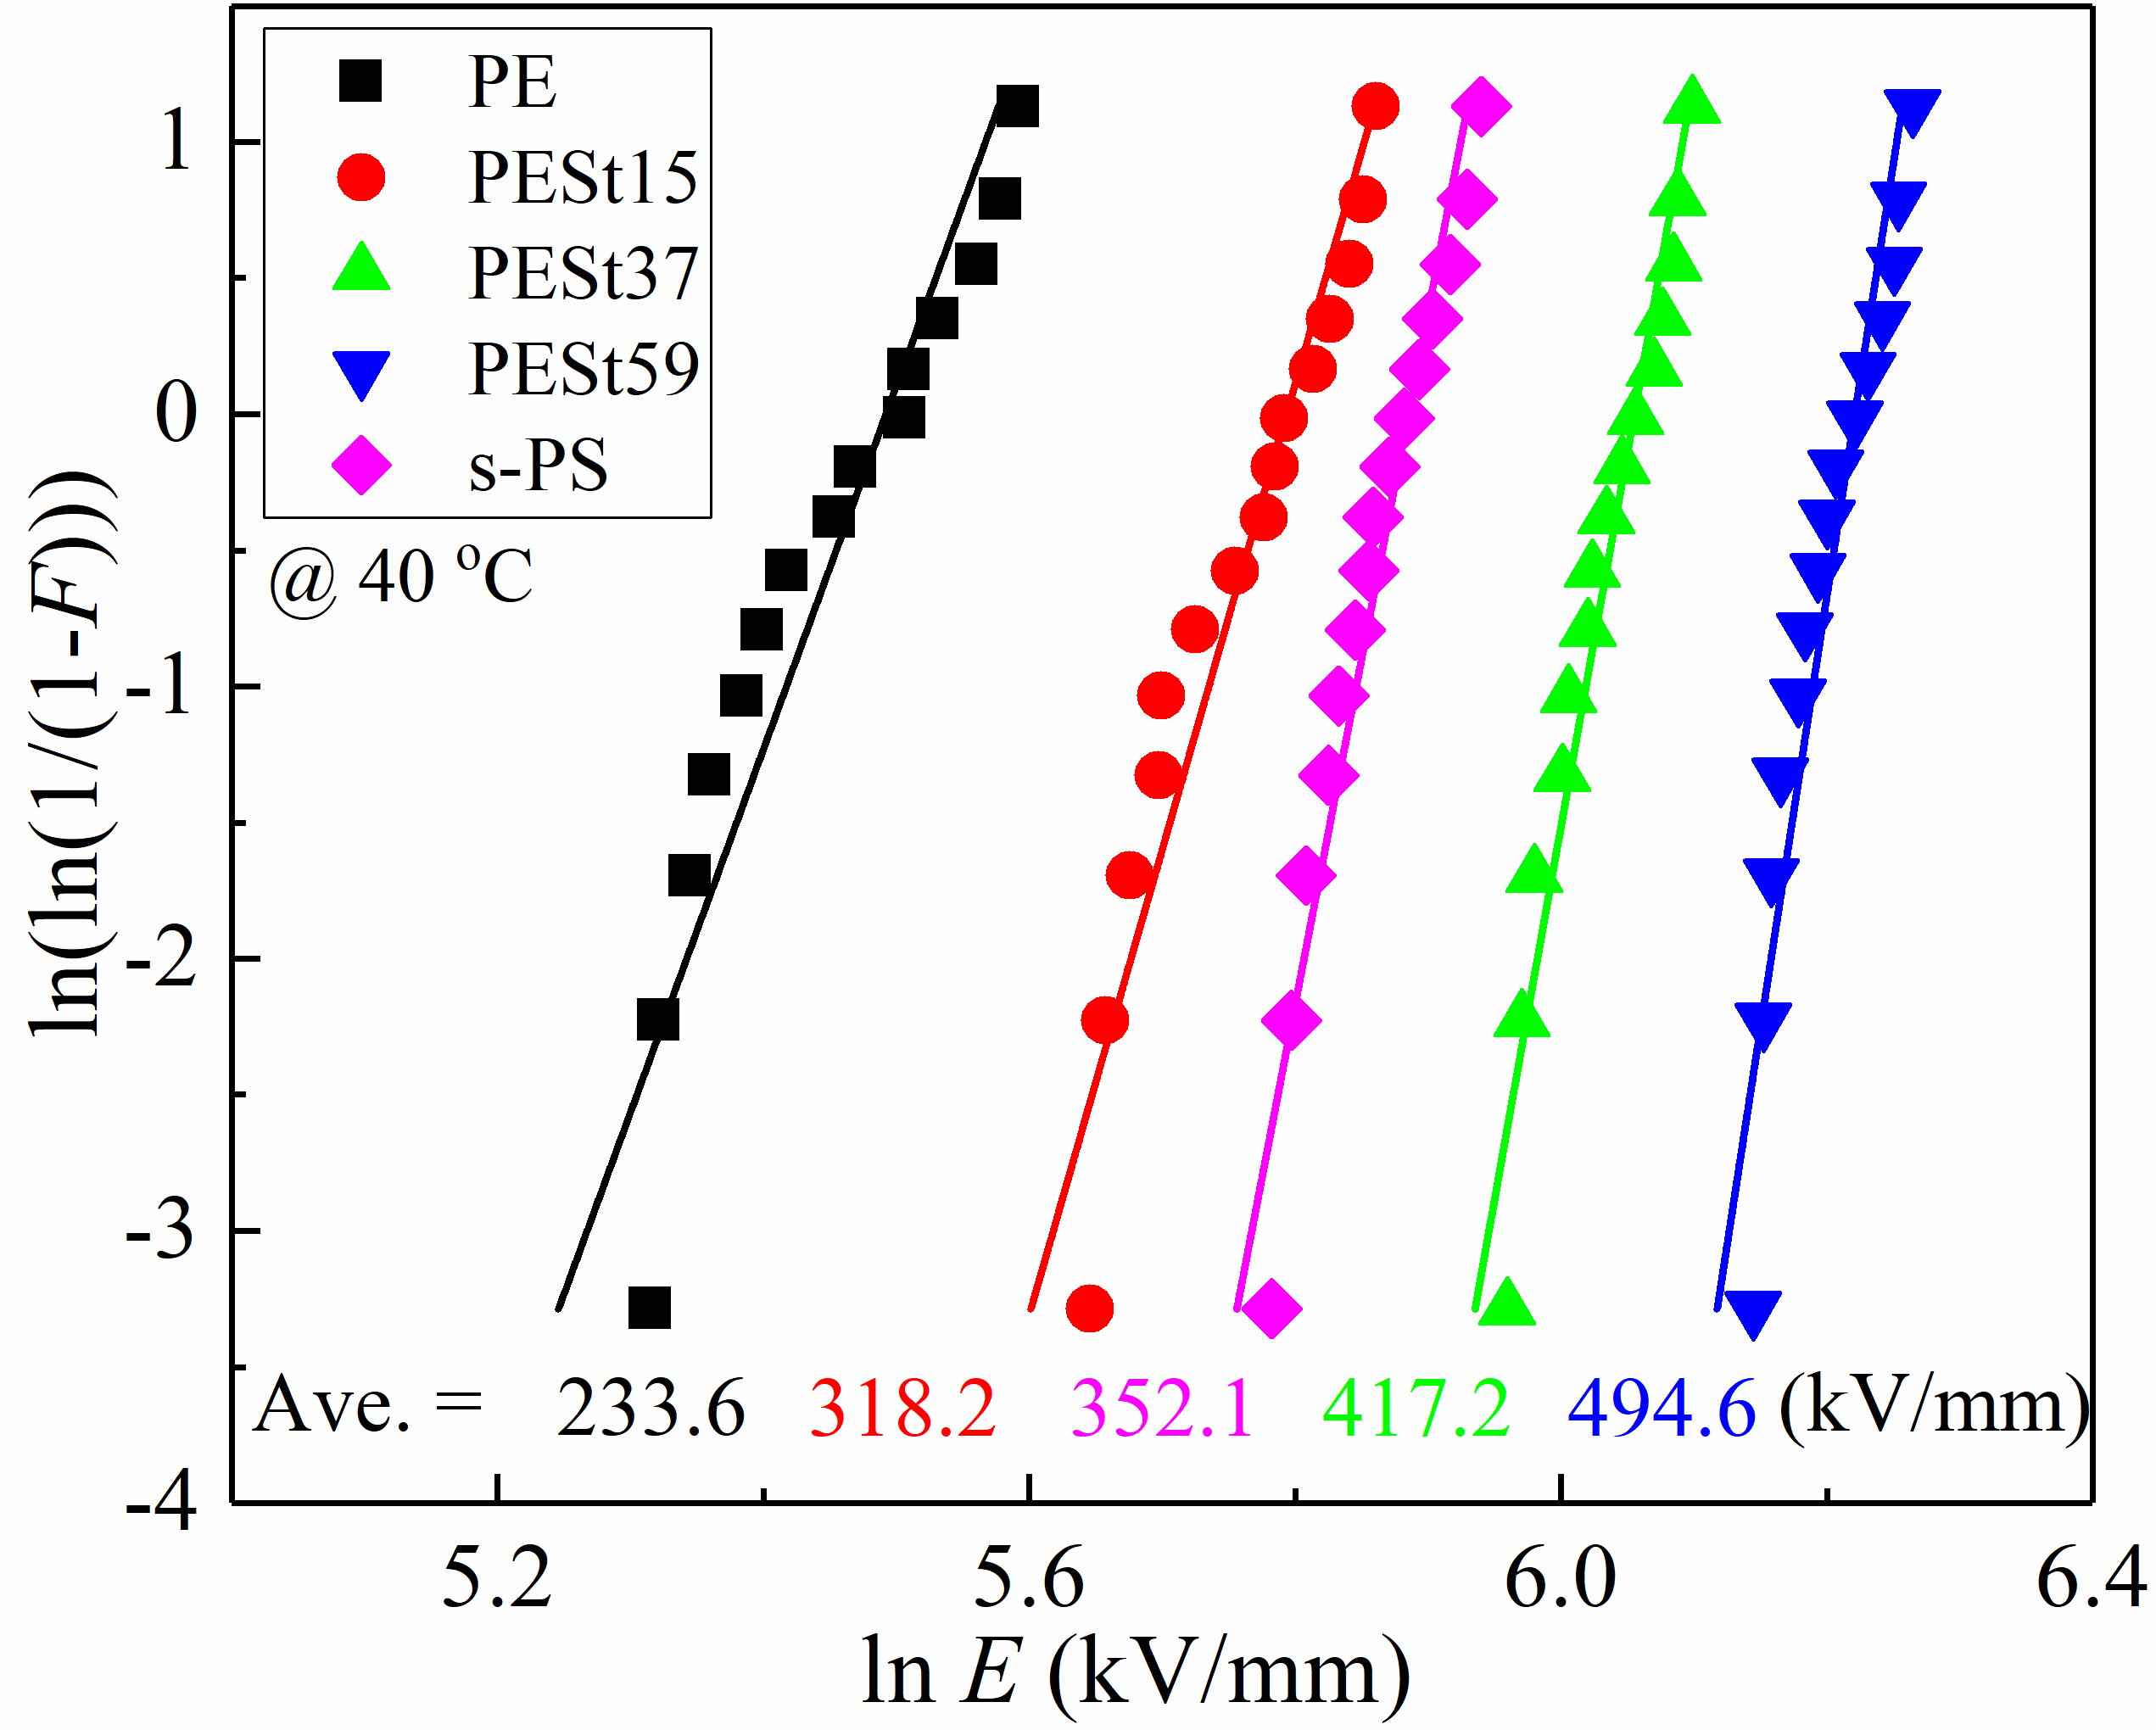

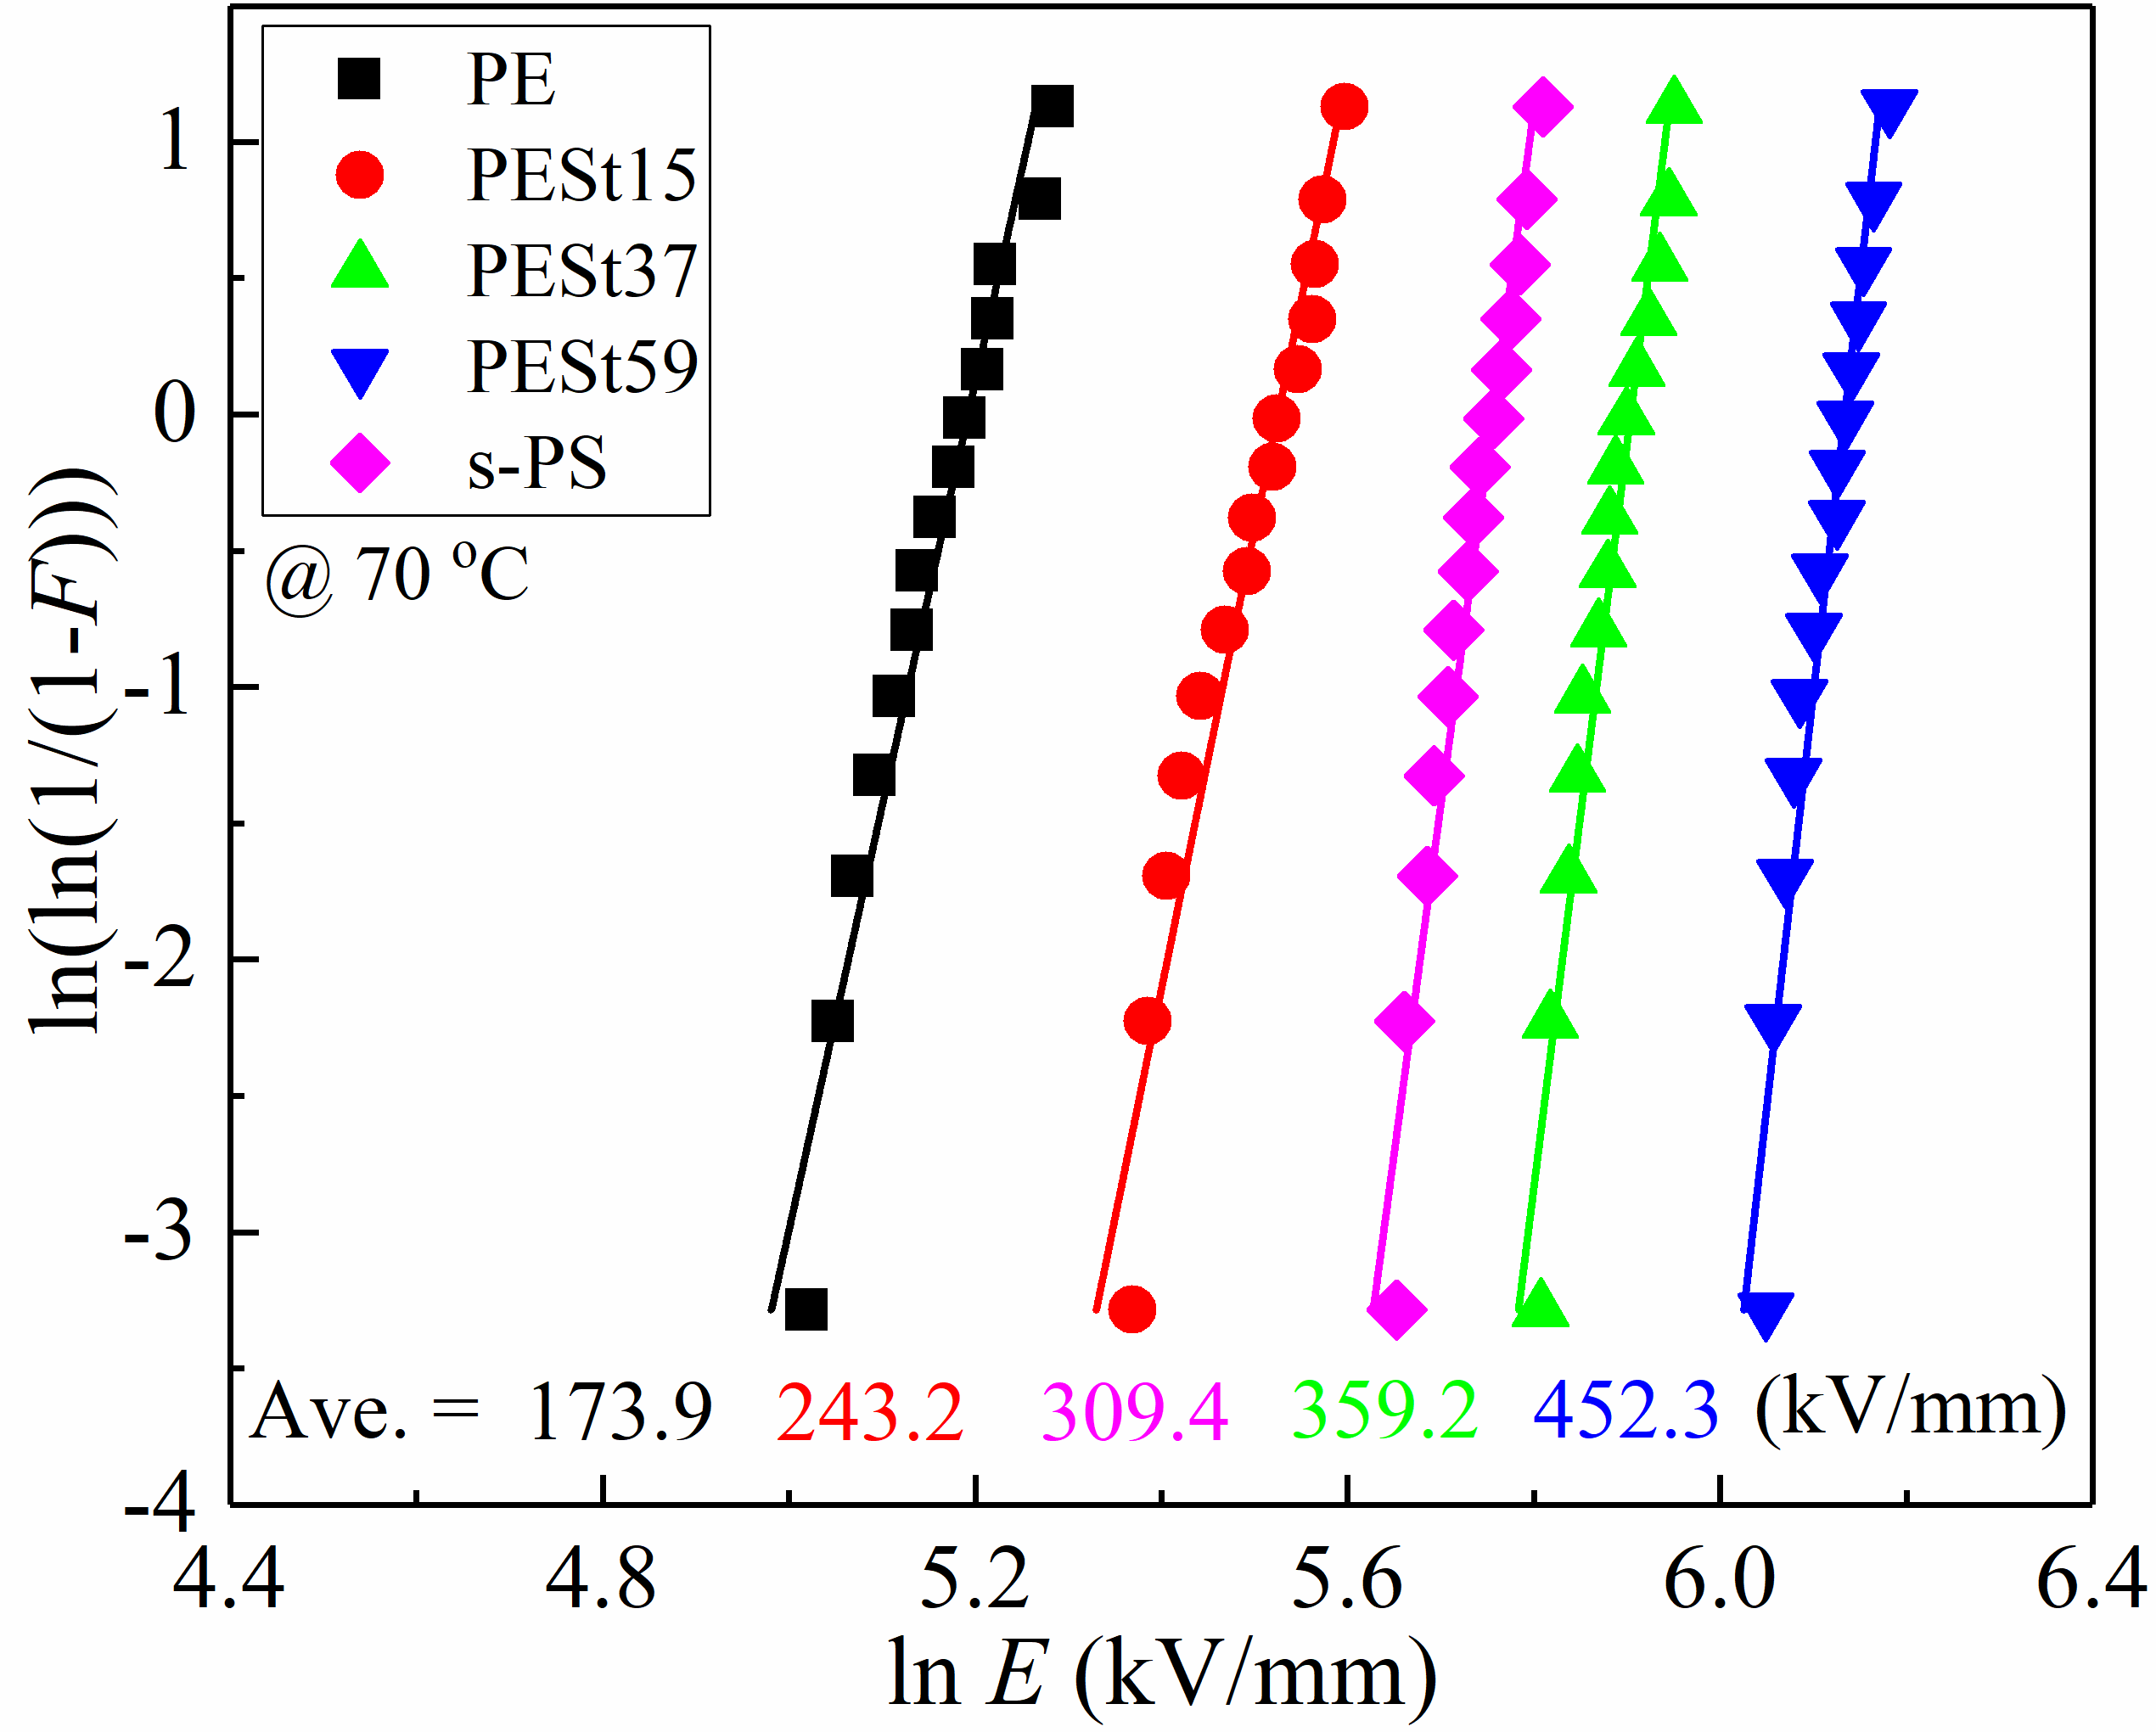

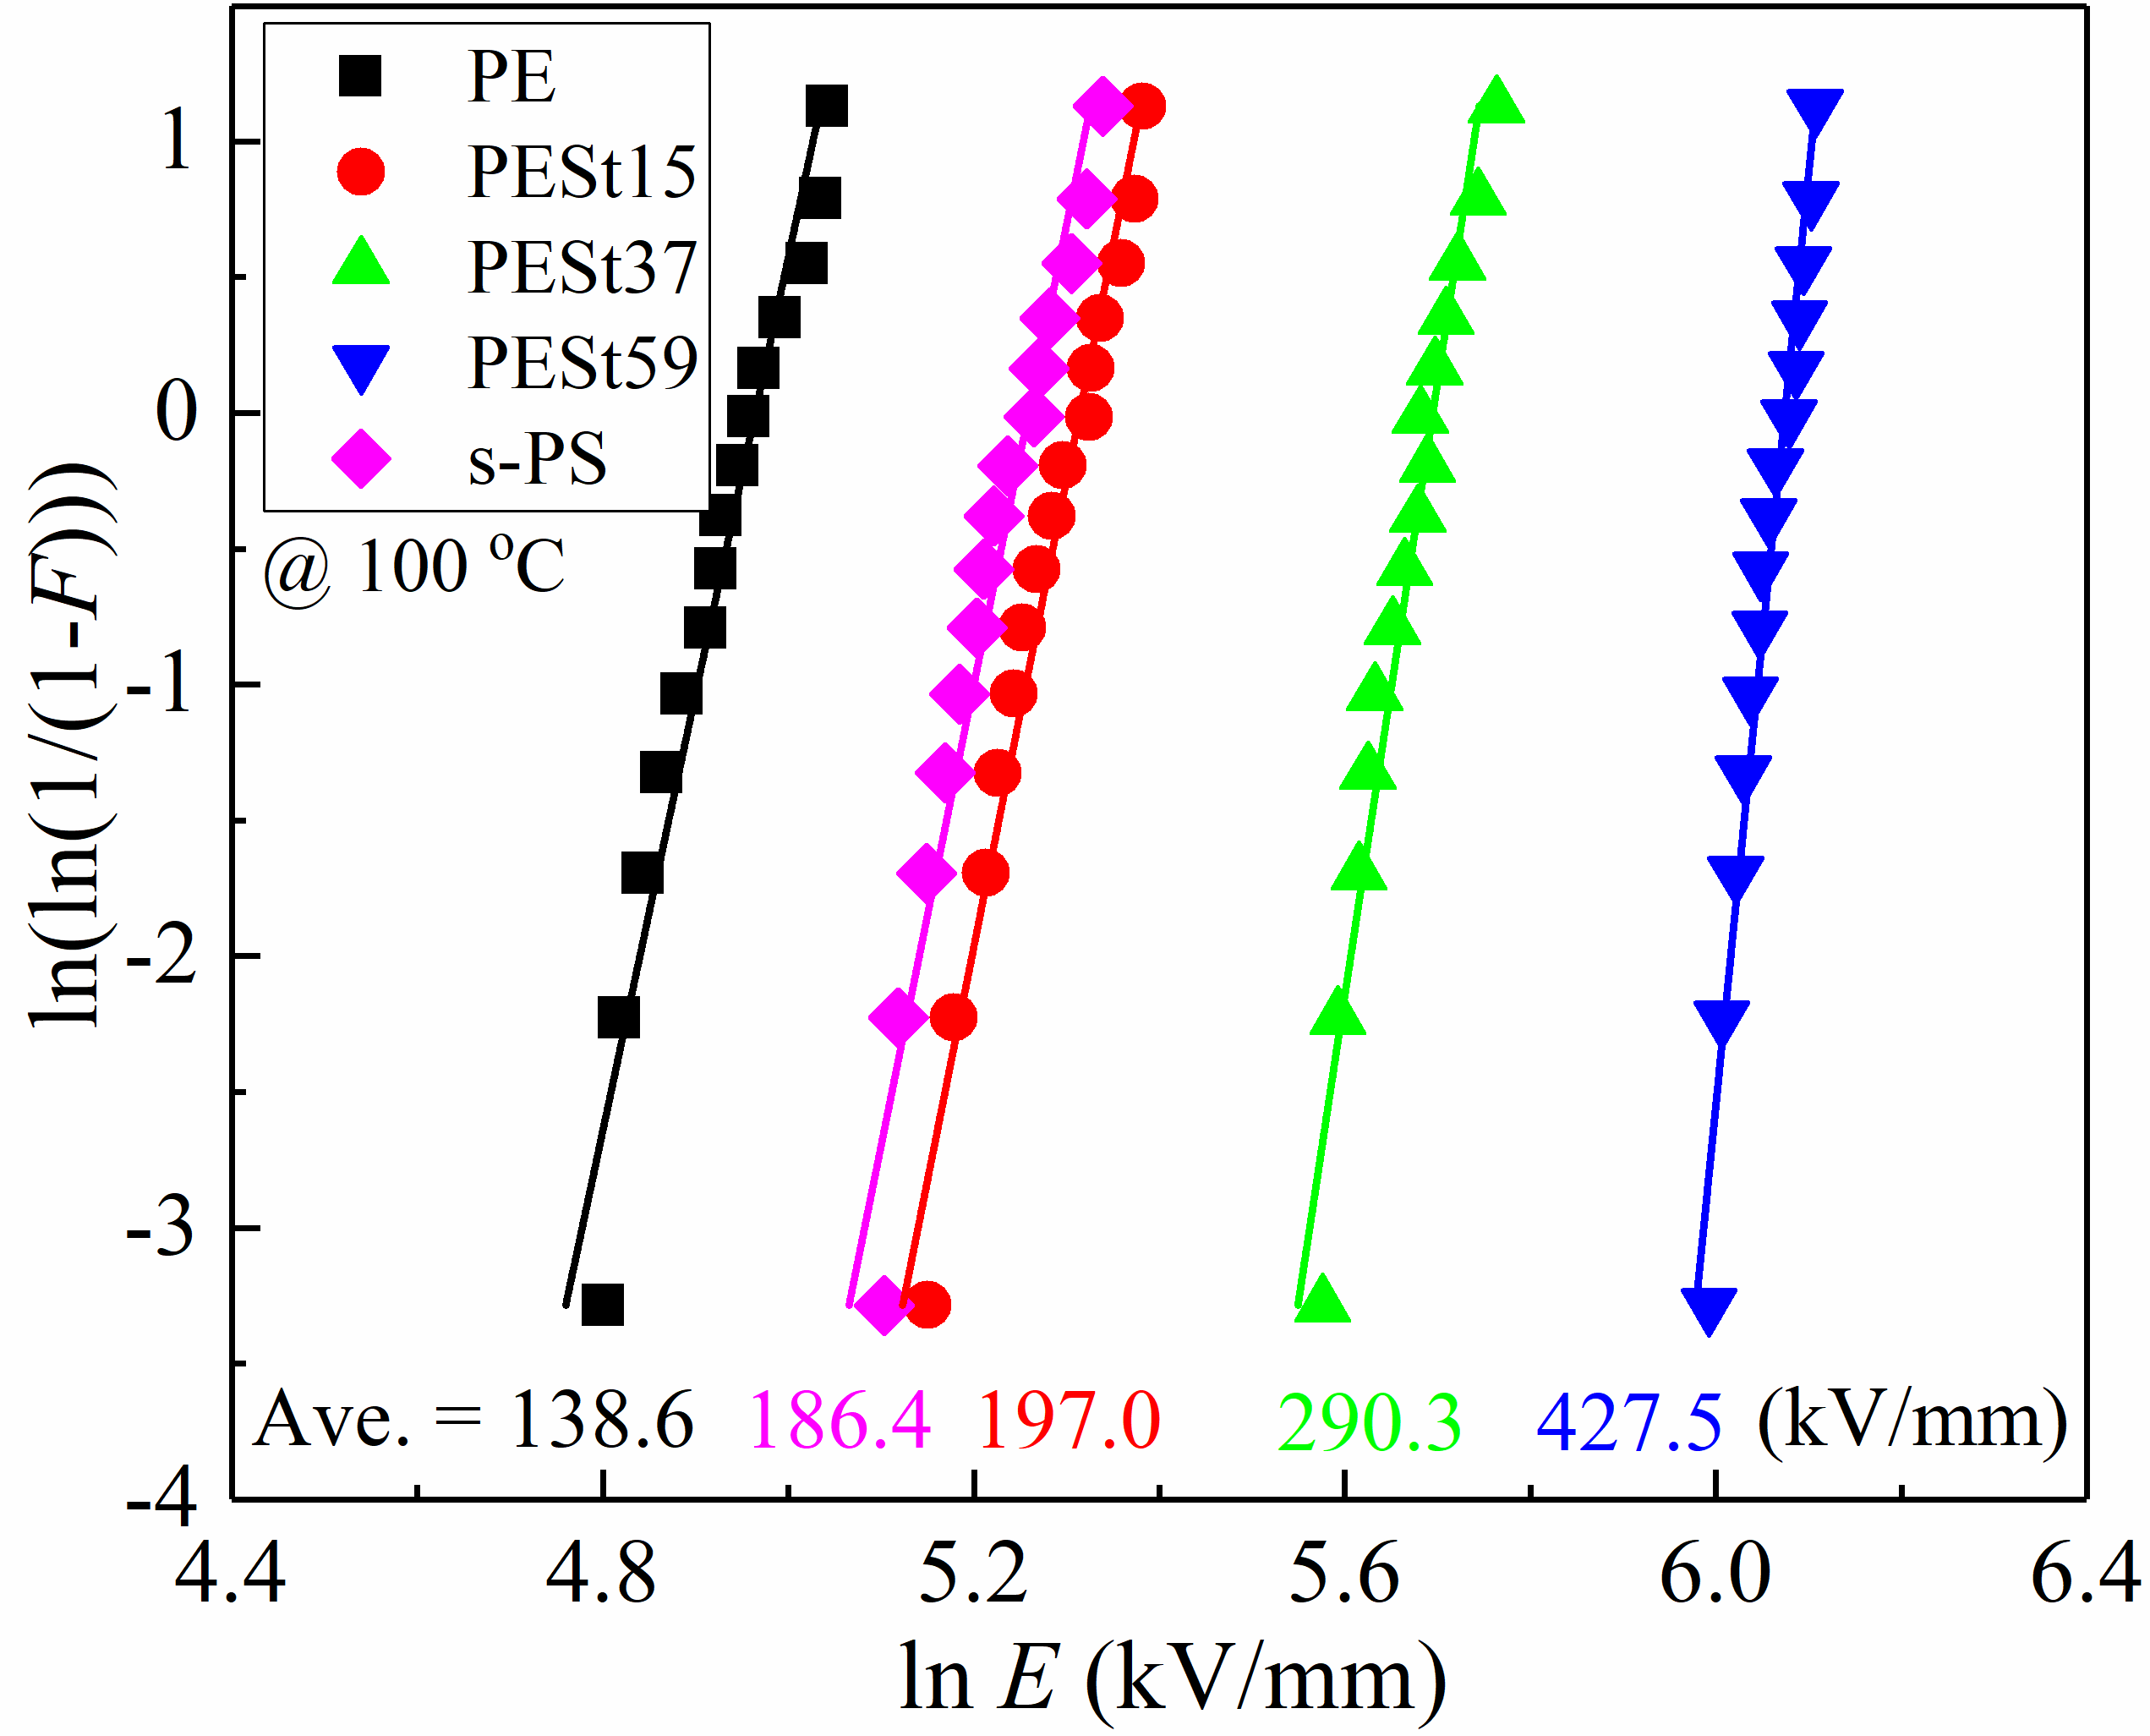


**Figure S4 |** Weibull distributions of DC breakdown strength of PE, PESt15, PESt37, PESt59 and s-PS at a) 40 oC, b) 70 oC c) 100 oC on 15 samples.

**a**

**b**

**c**


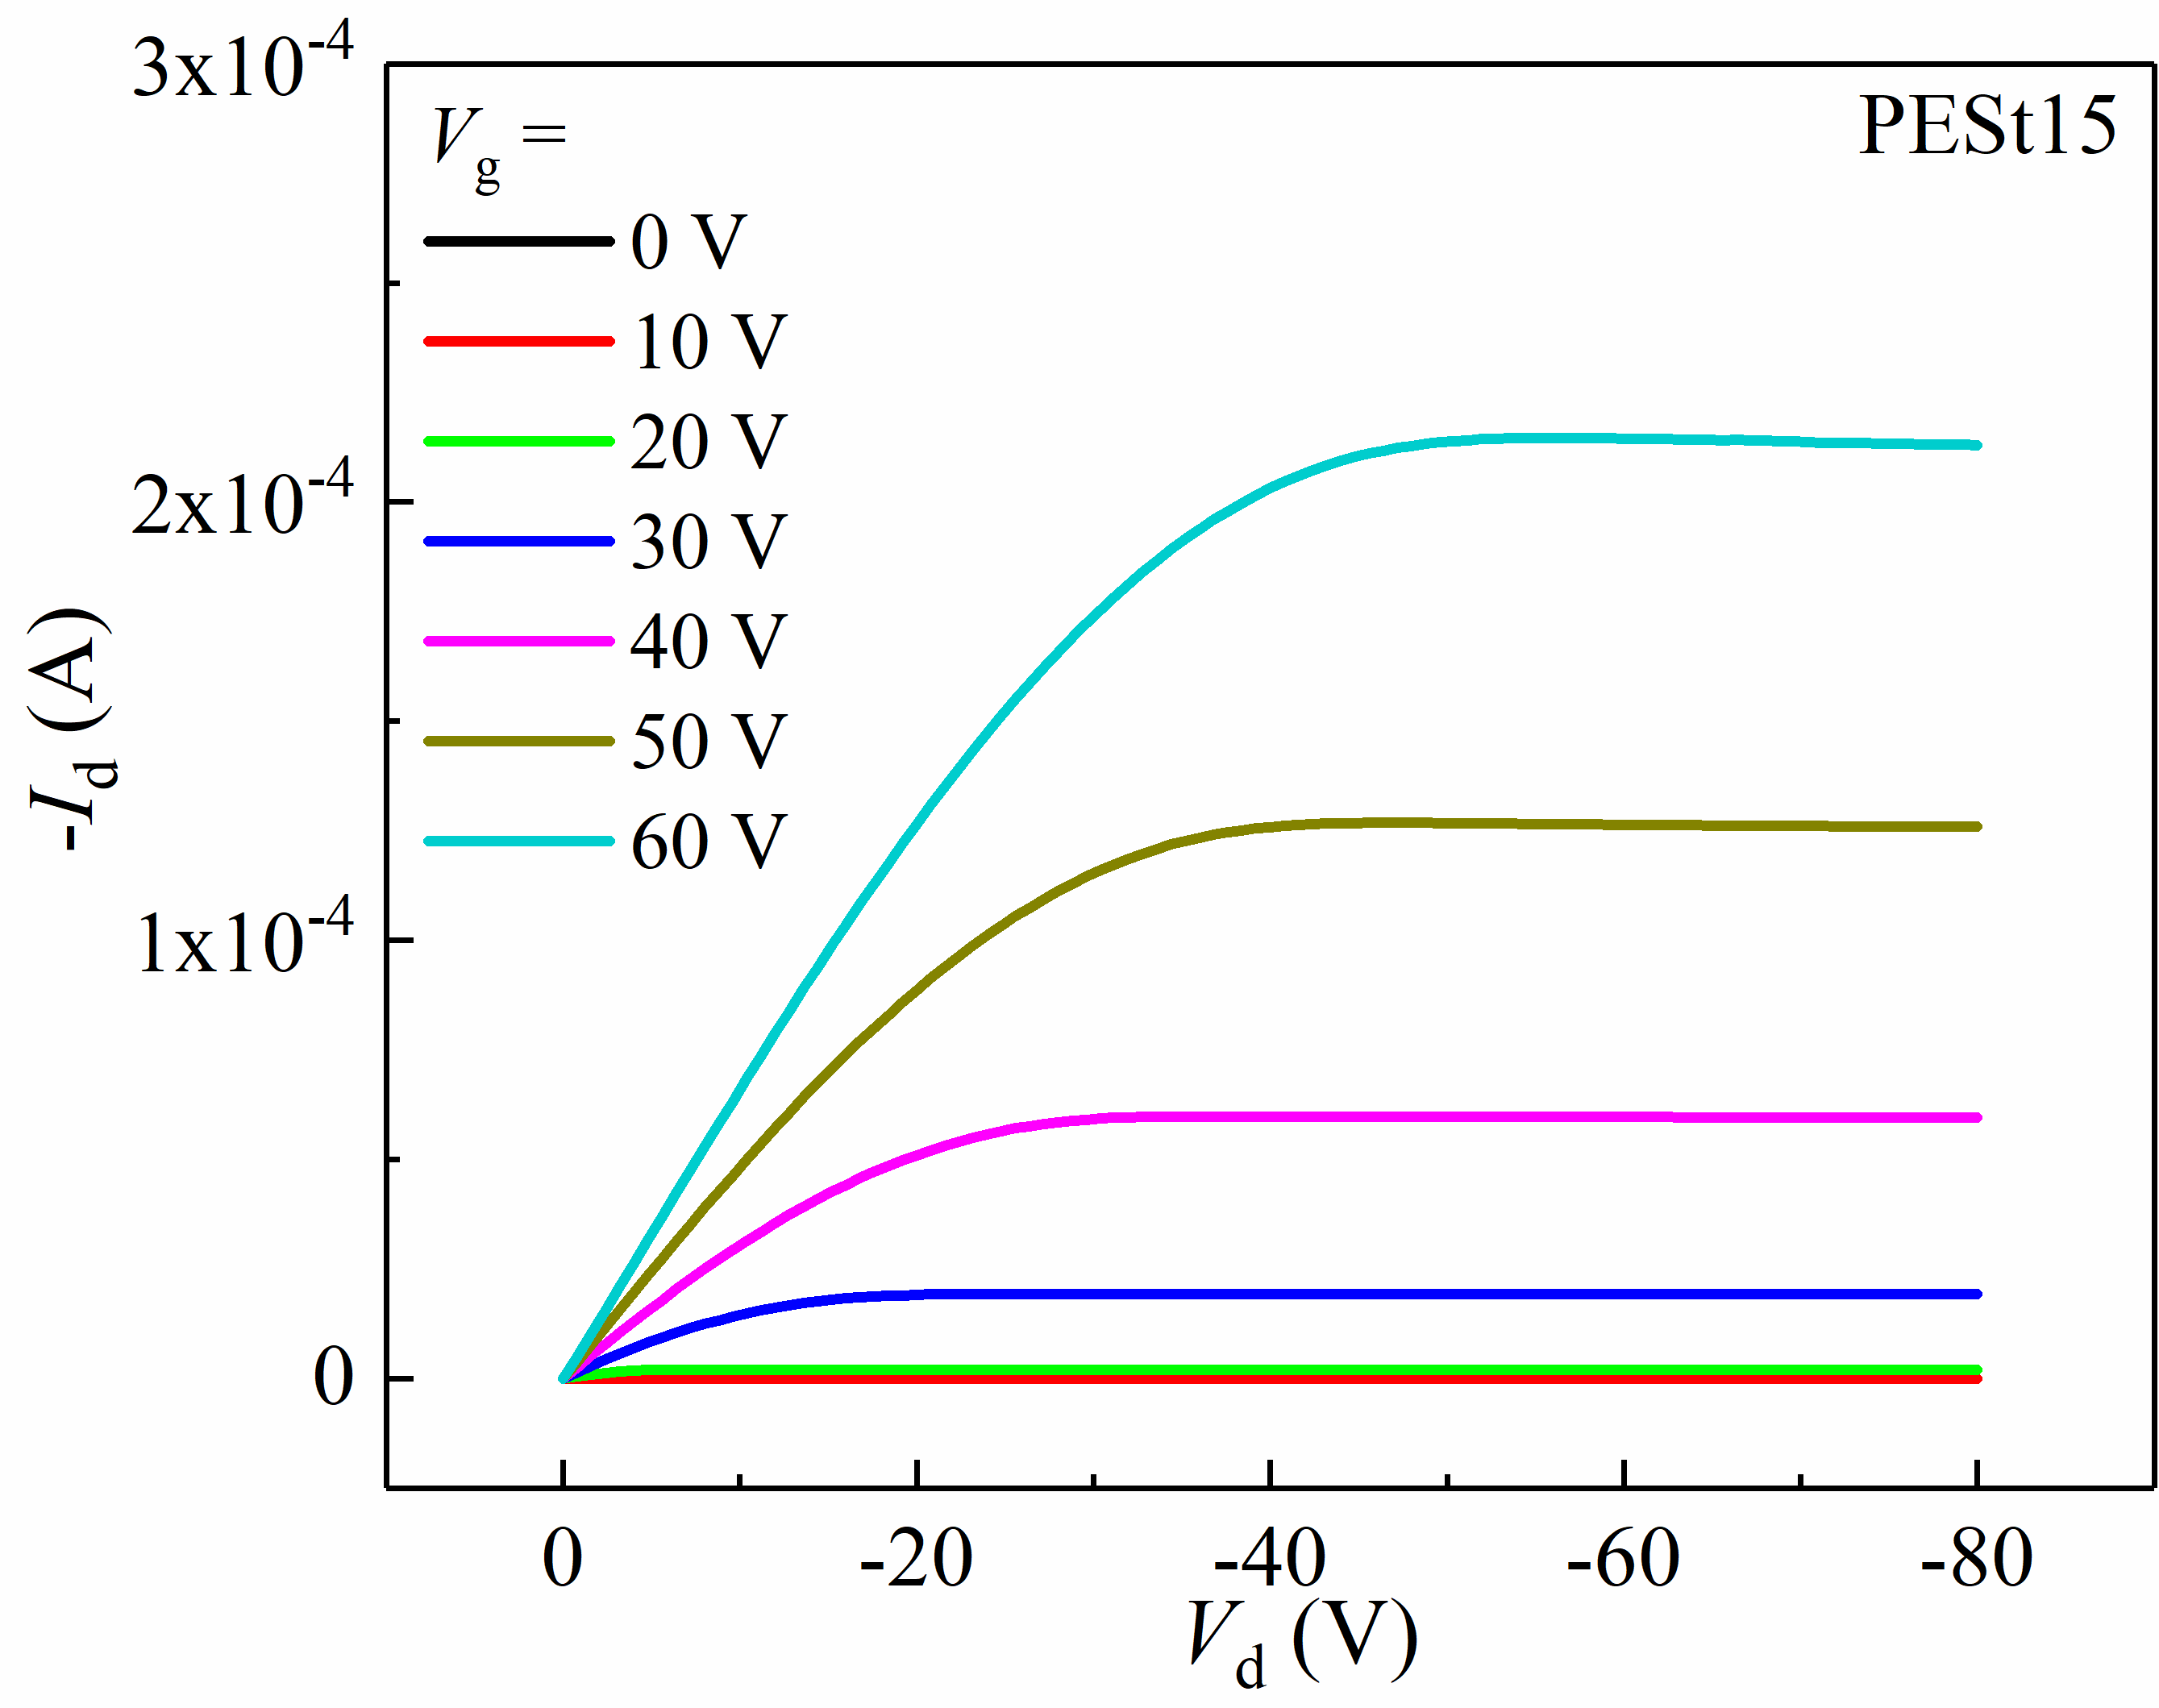

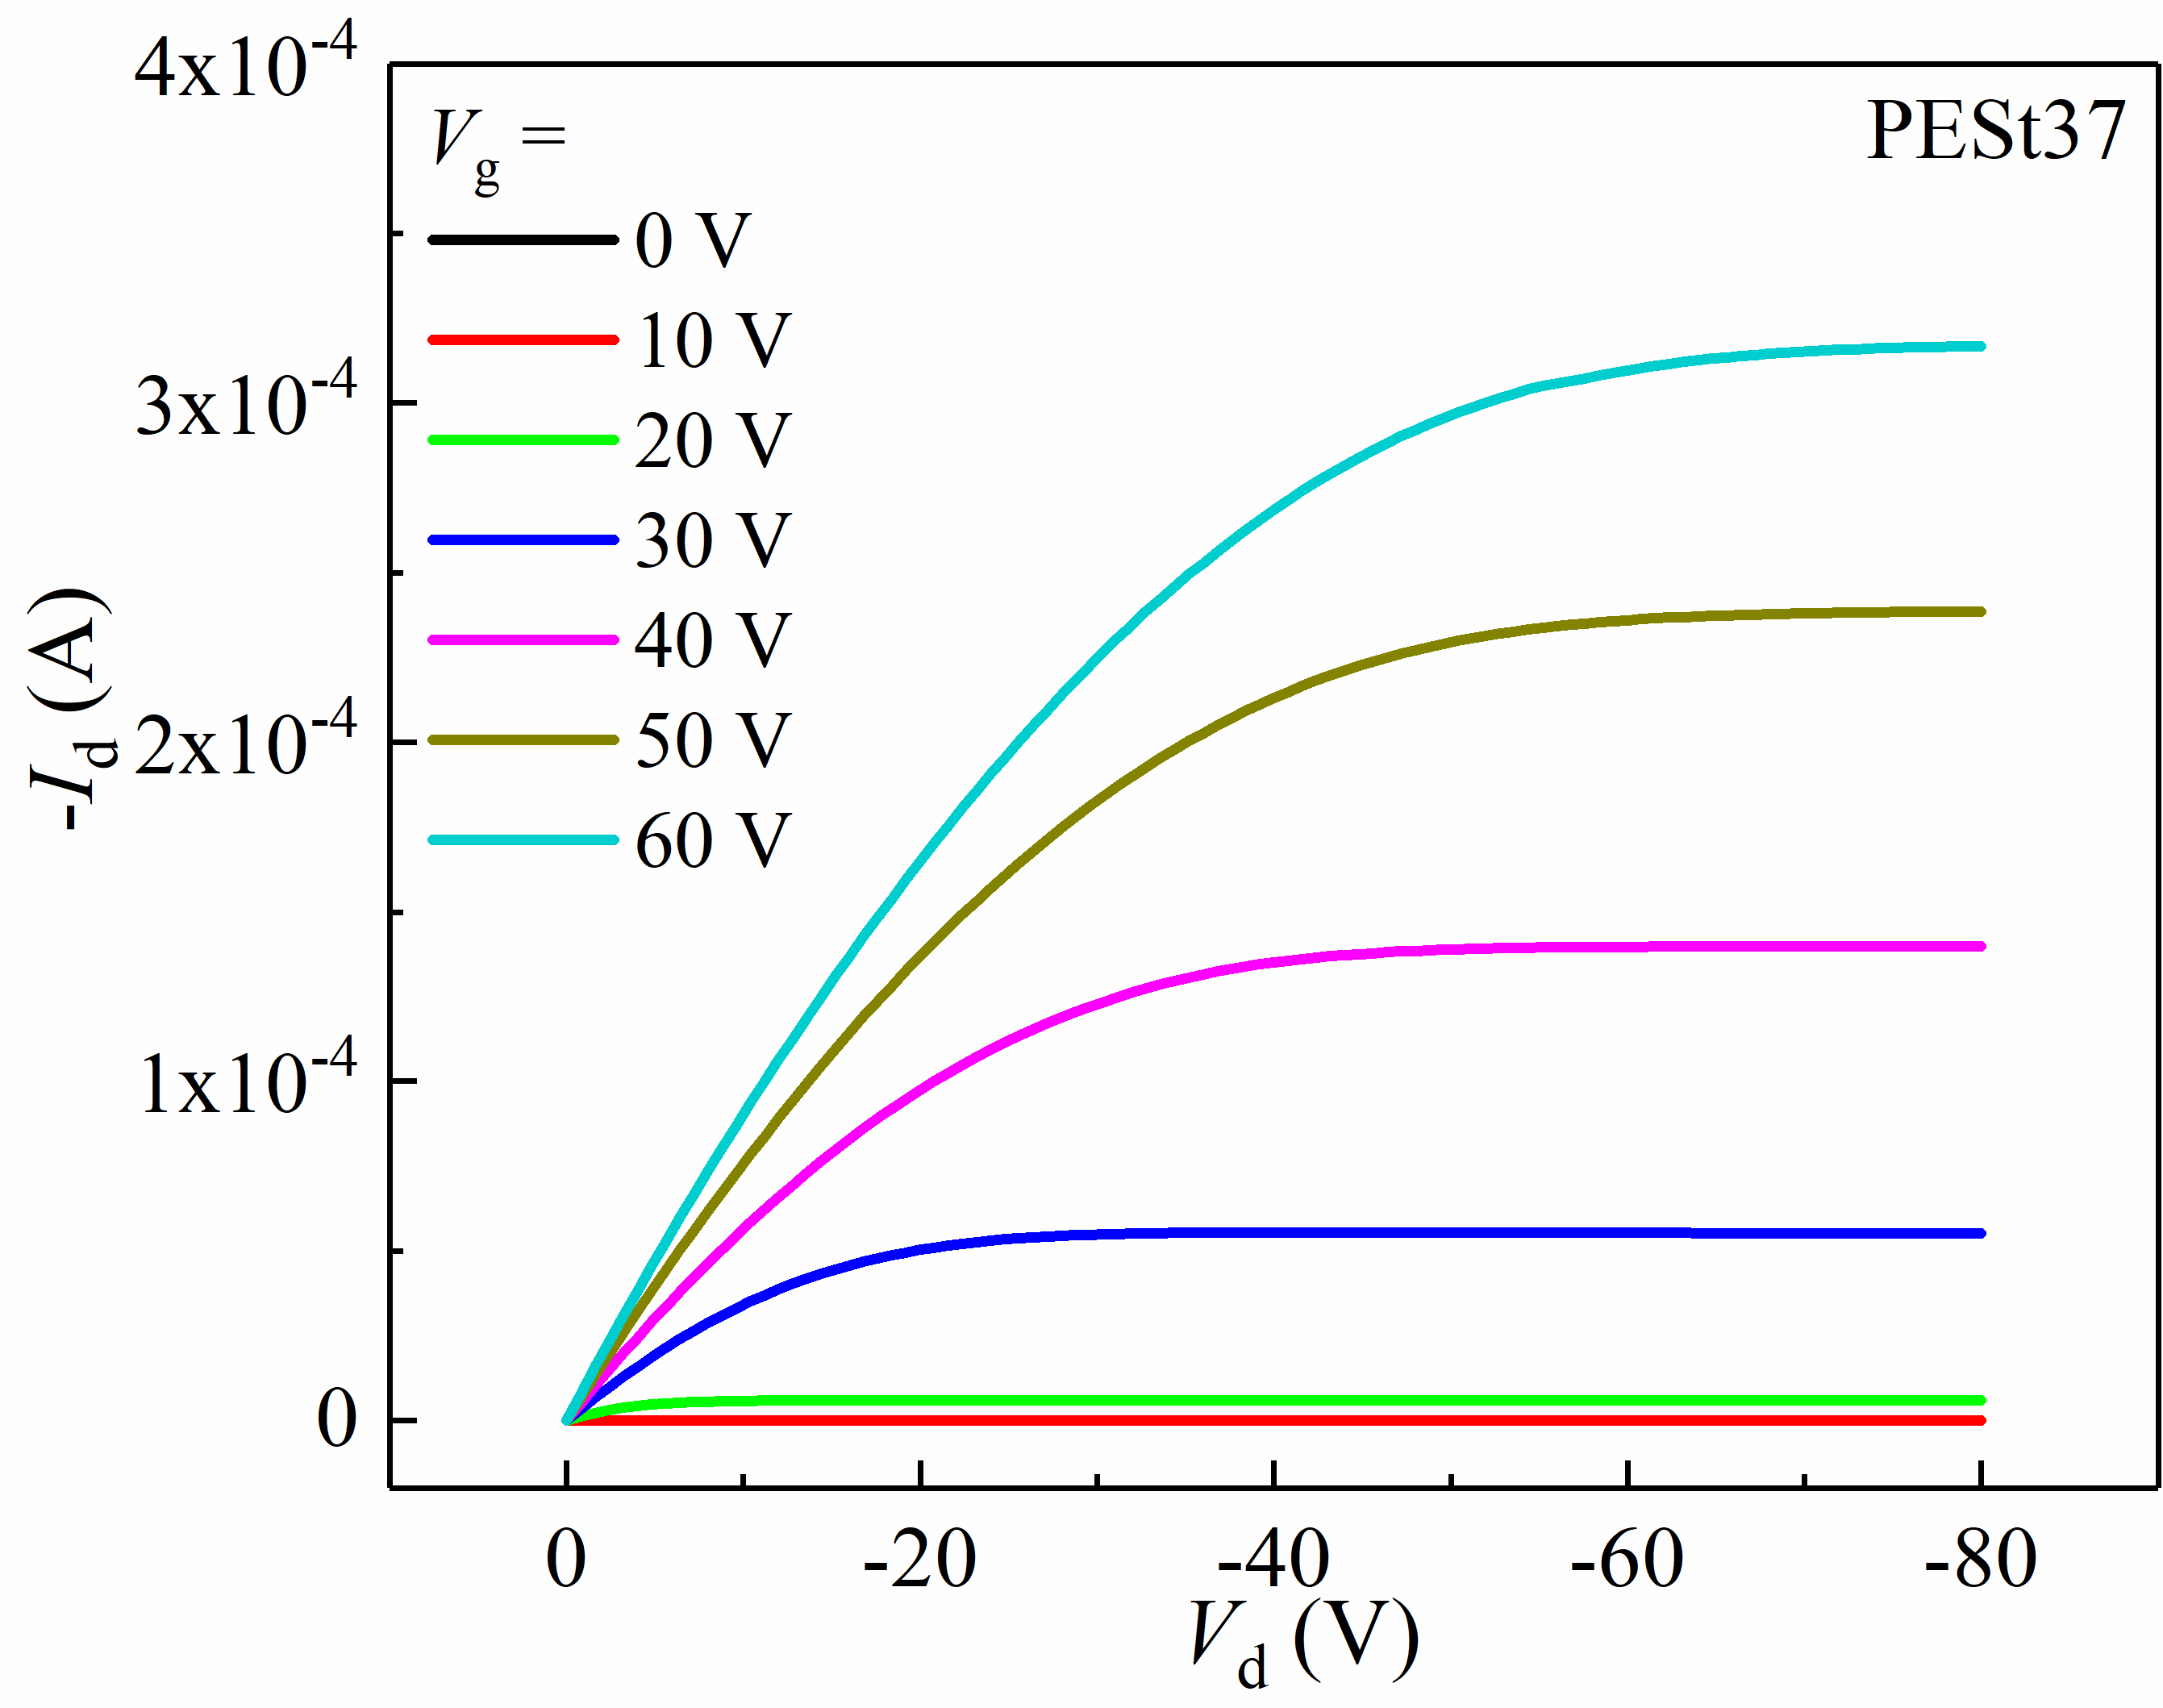

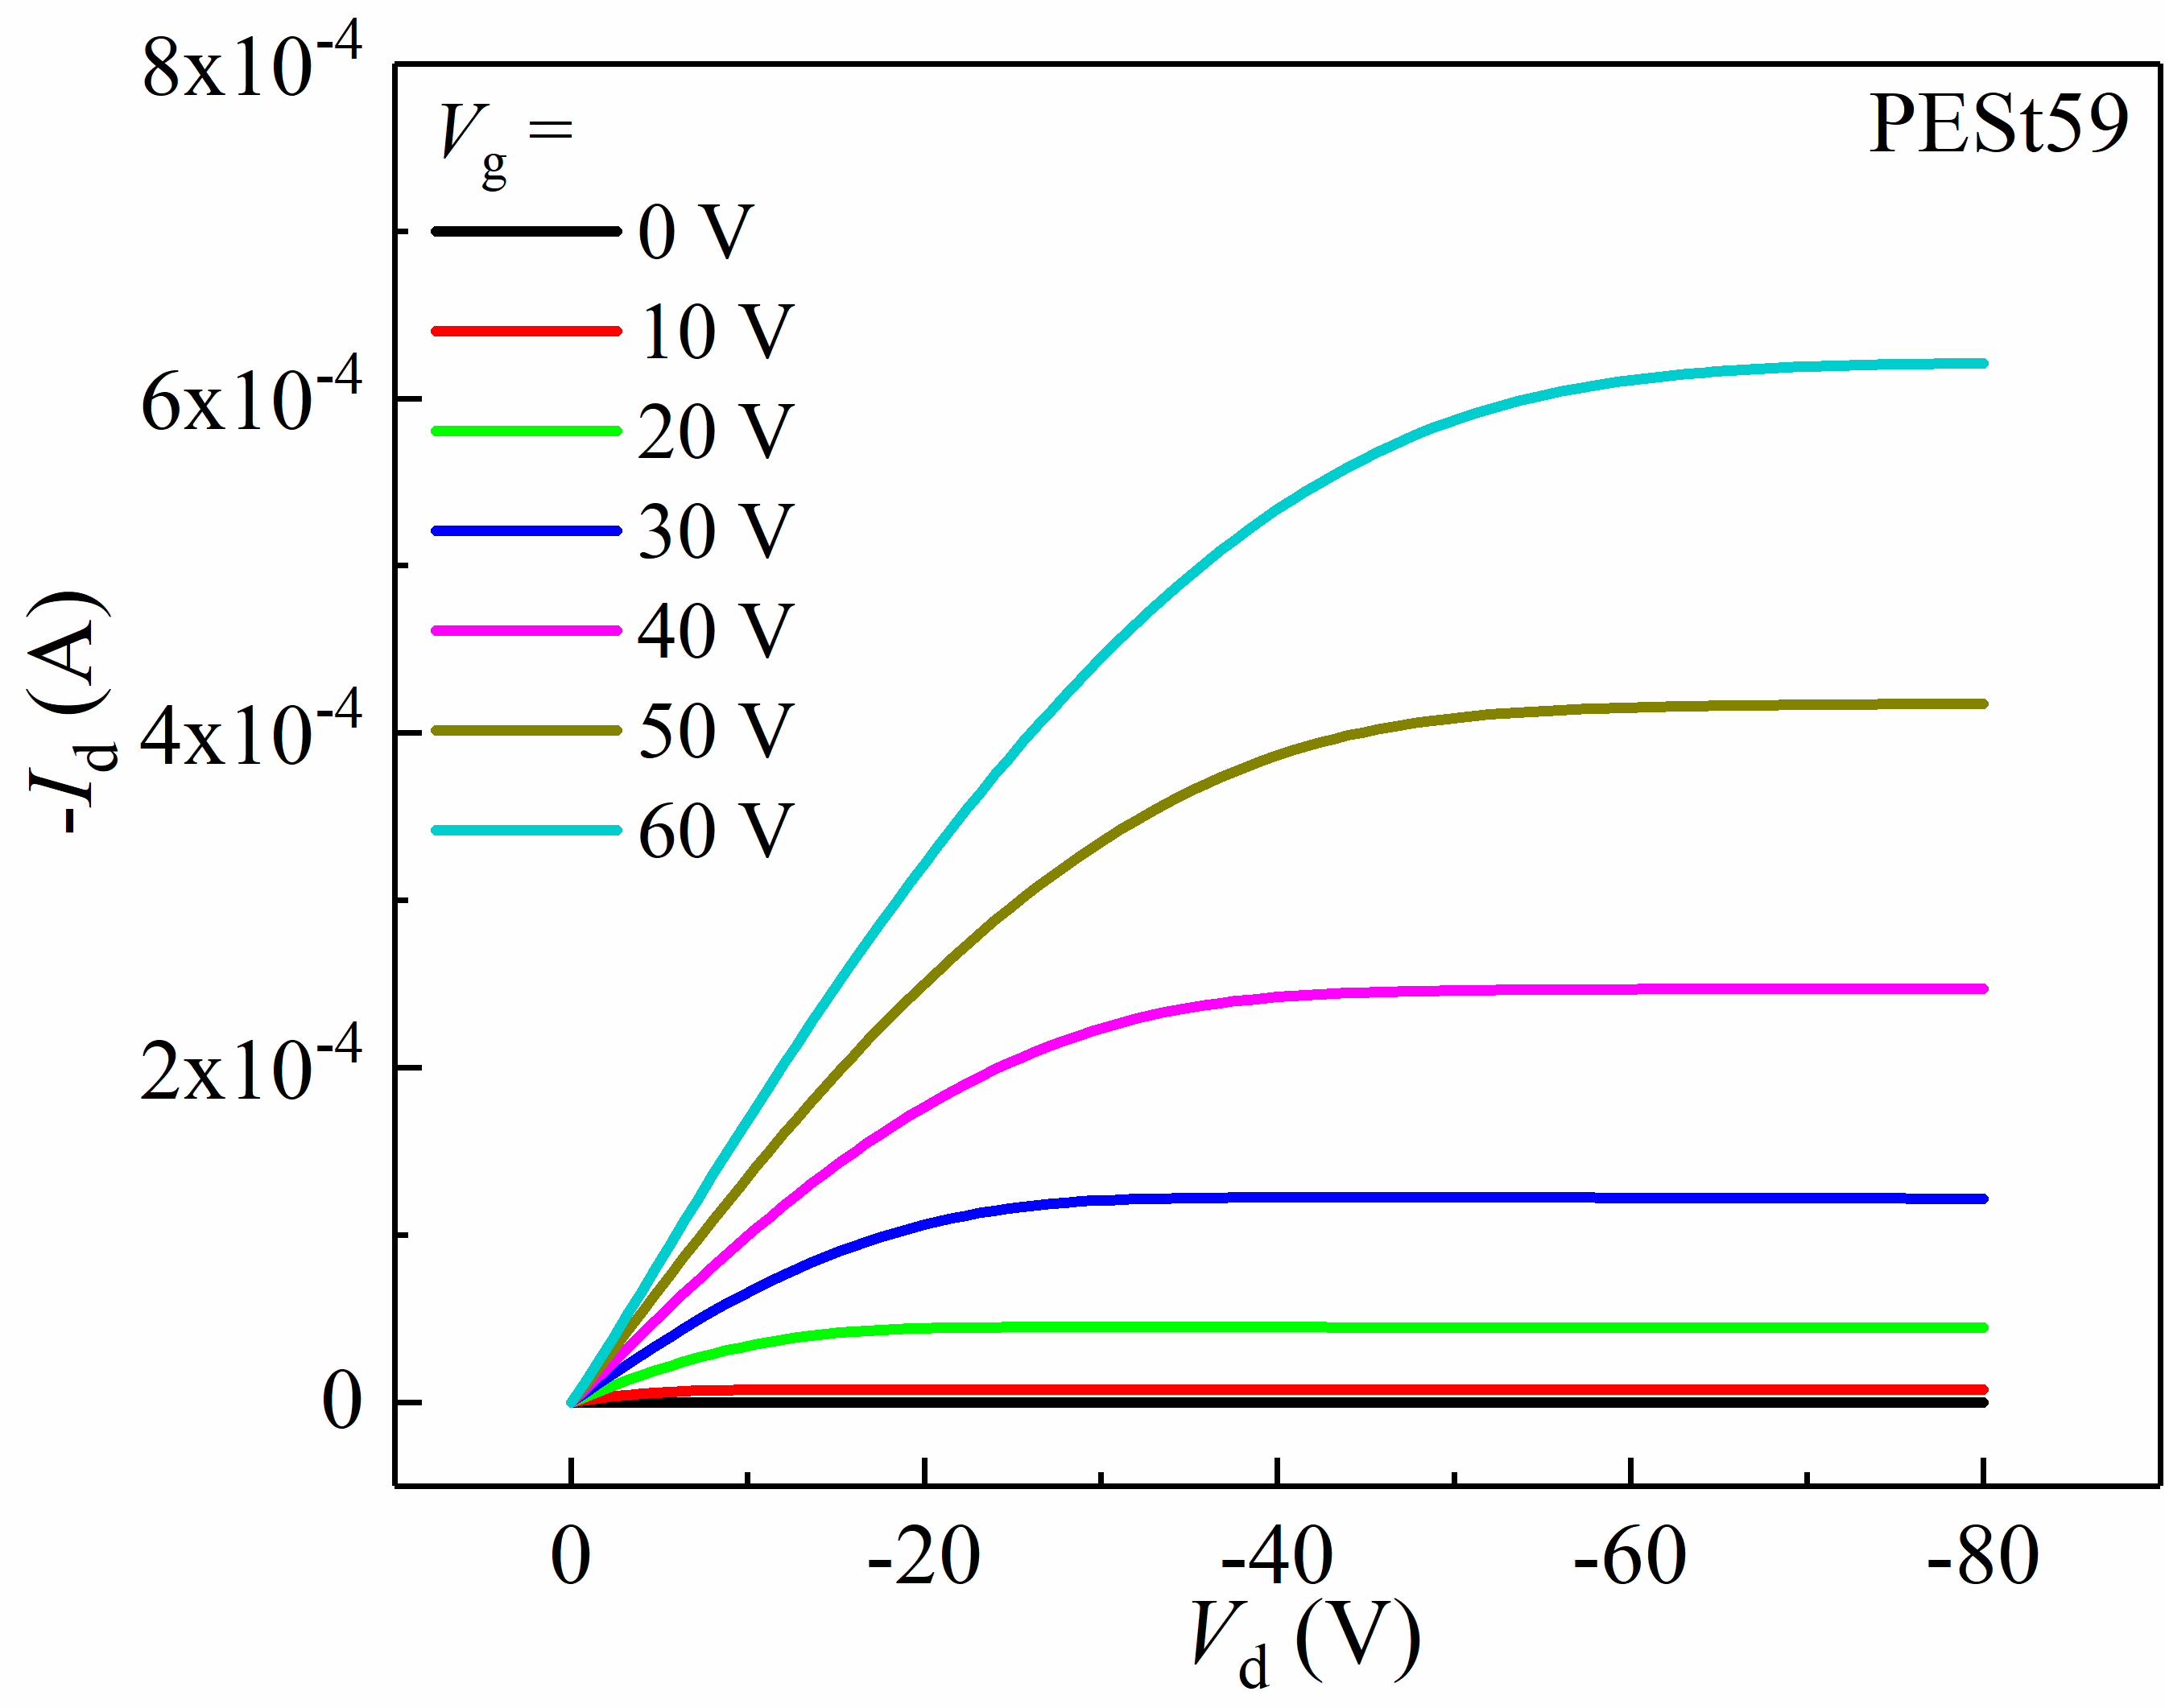


**Figure S5 |** Output characteristics of C12-BTBT OFETs with a) PESt15, b) PESt37 and c) PESt59 gate dielectrics.


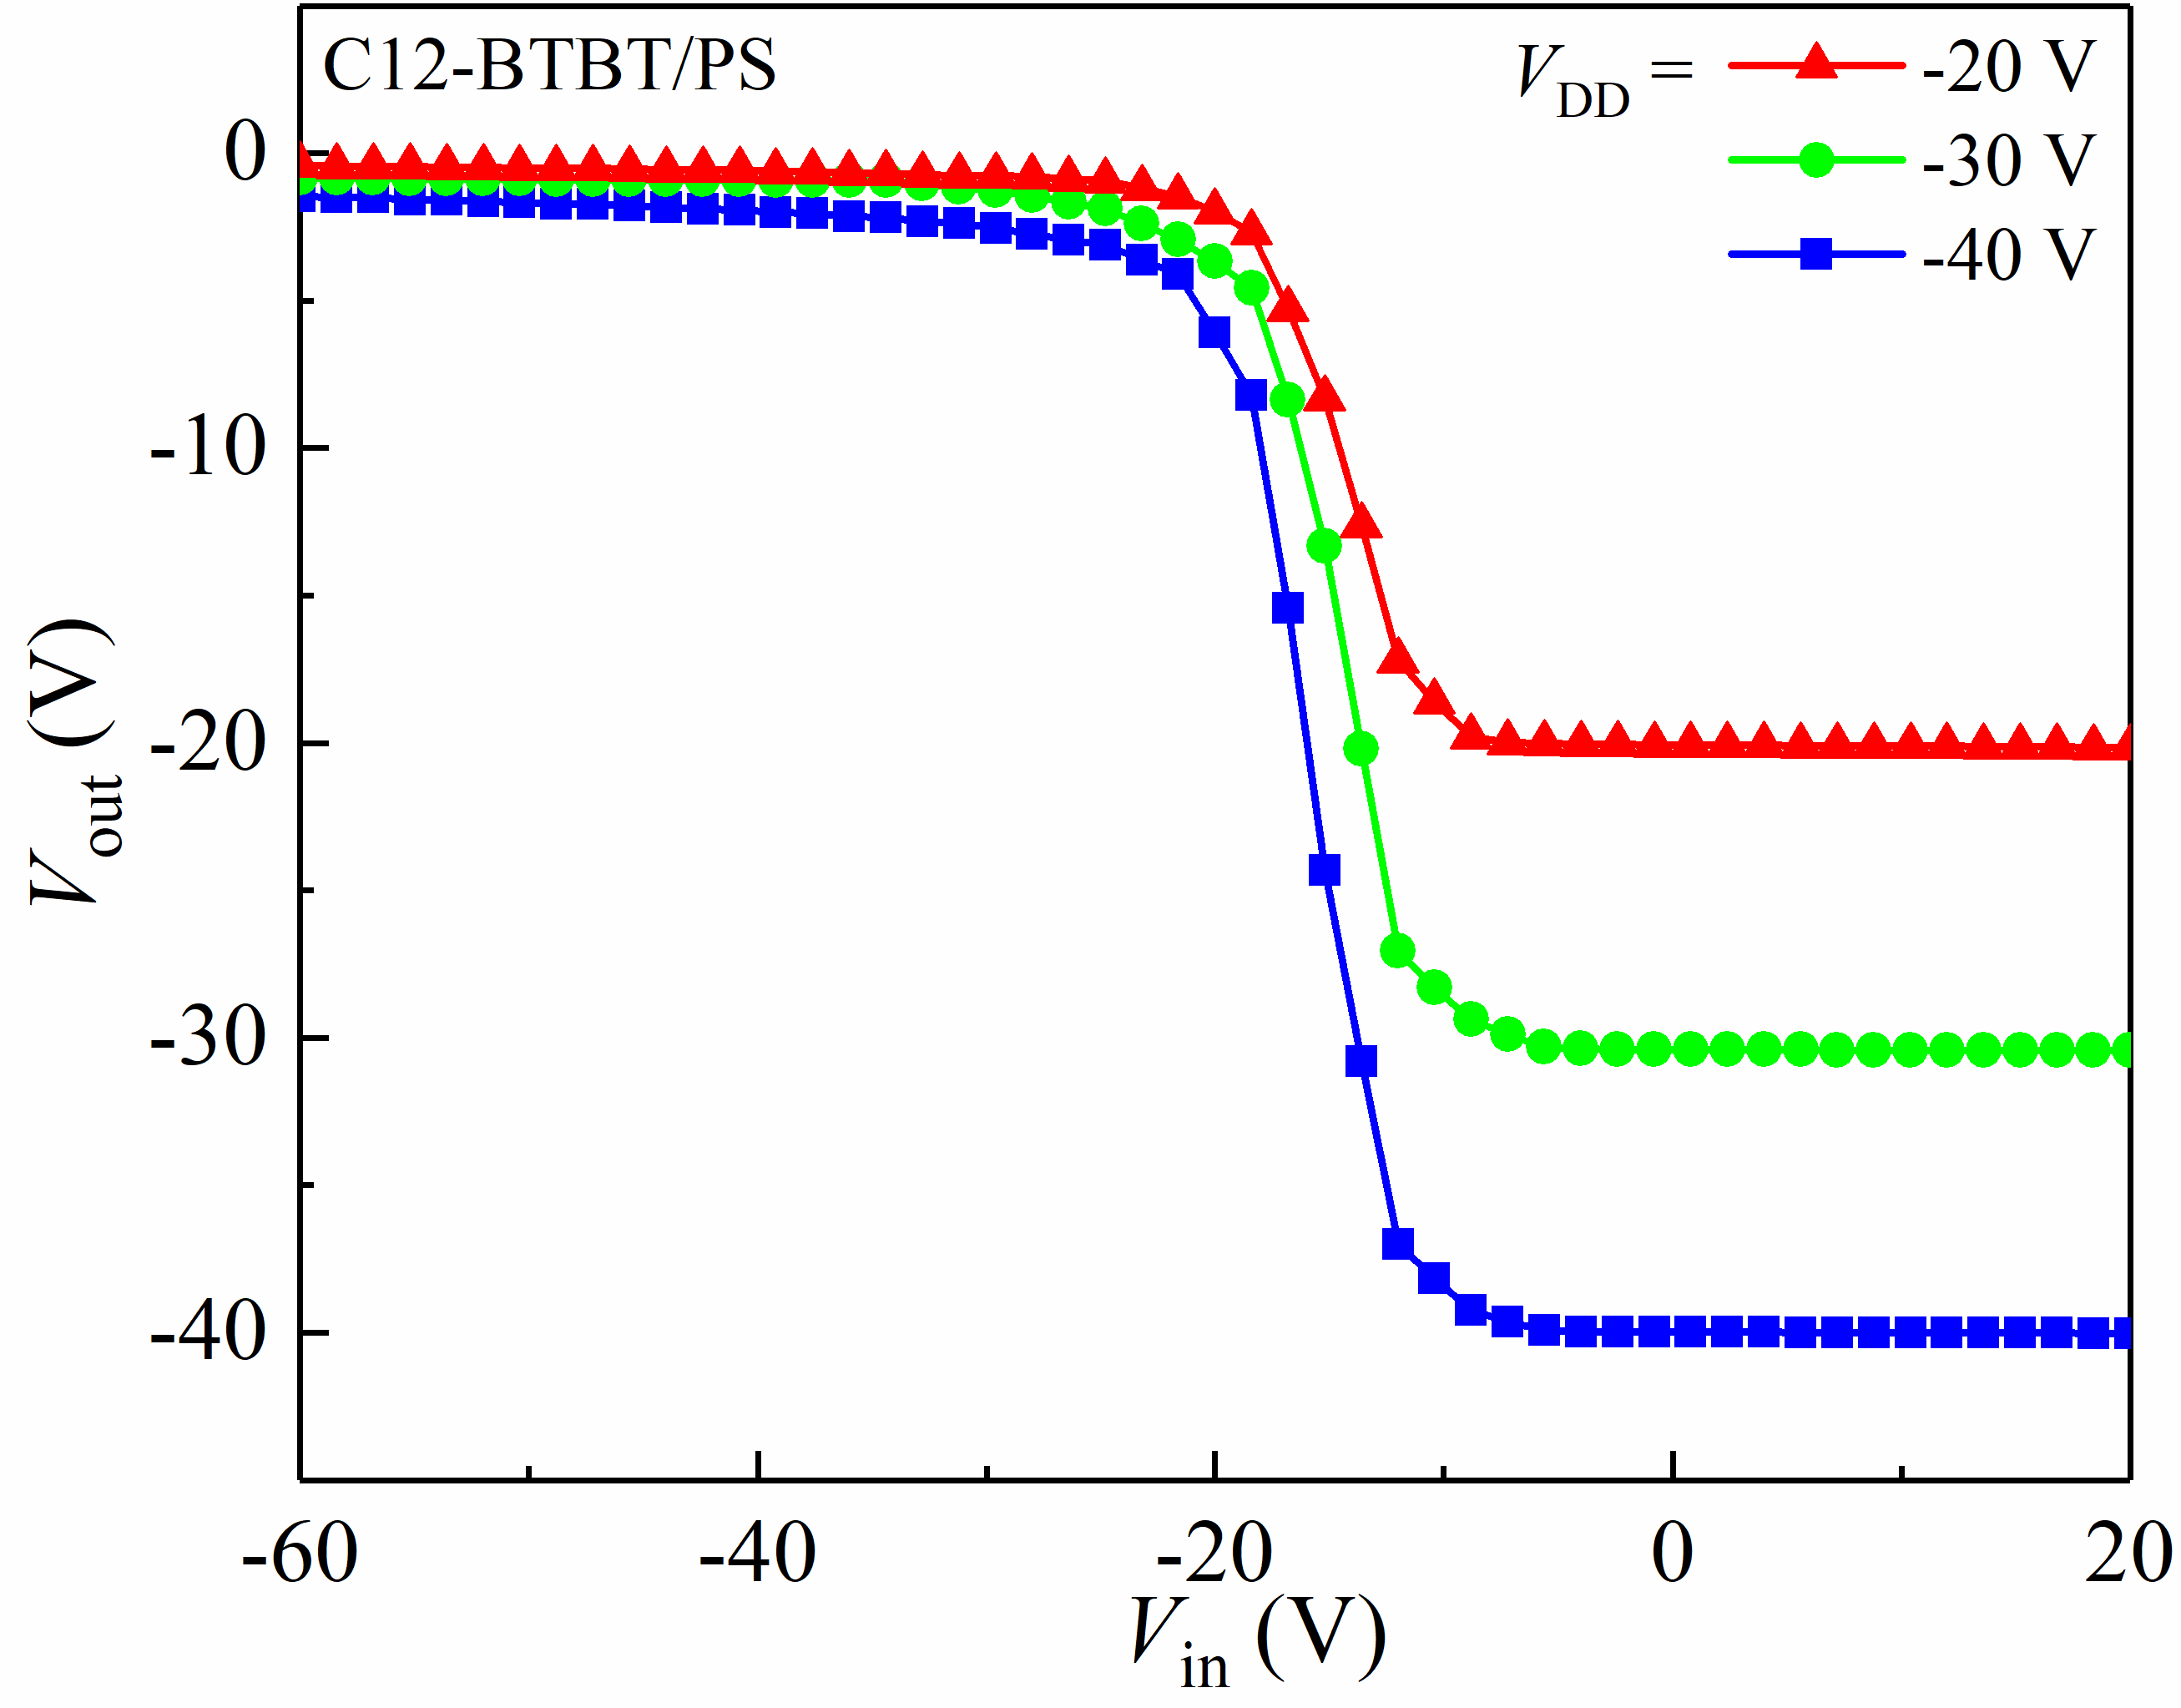


**Figure S6 |** Voltage transfer characteristics of the C12-BTBT/PS inverter.

**
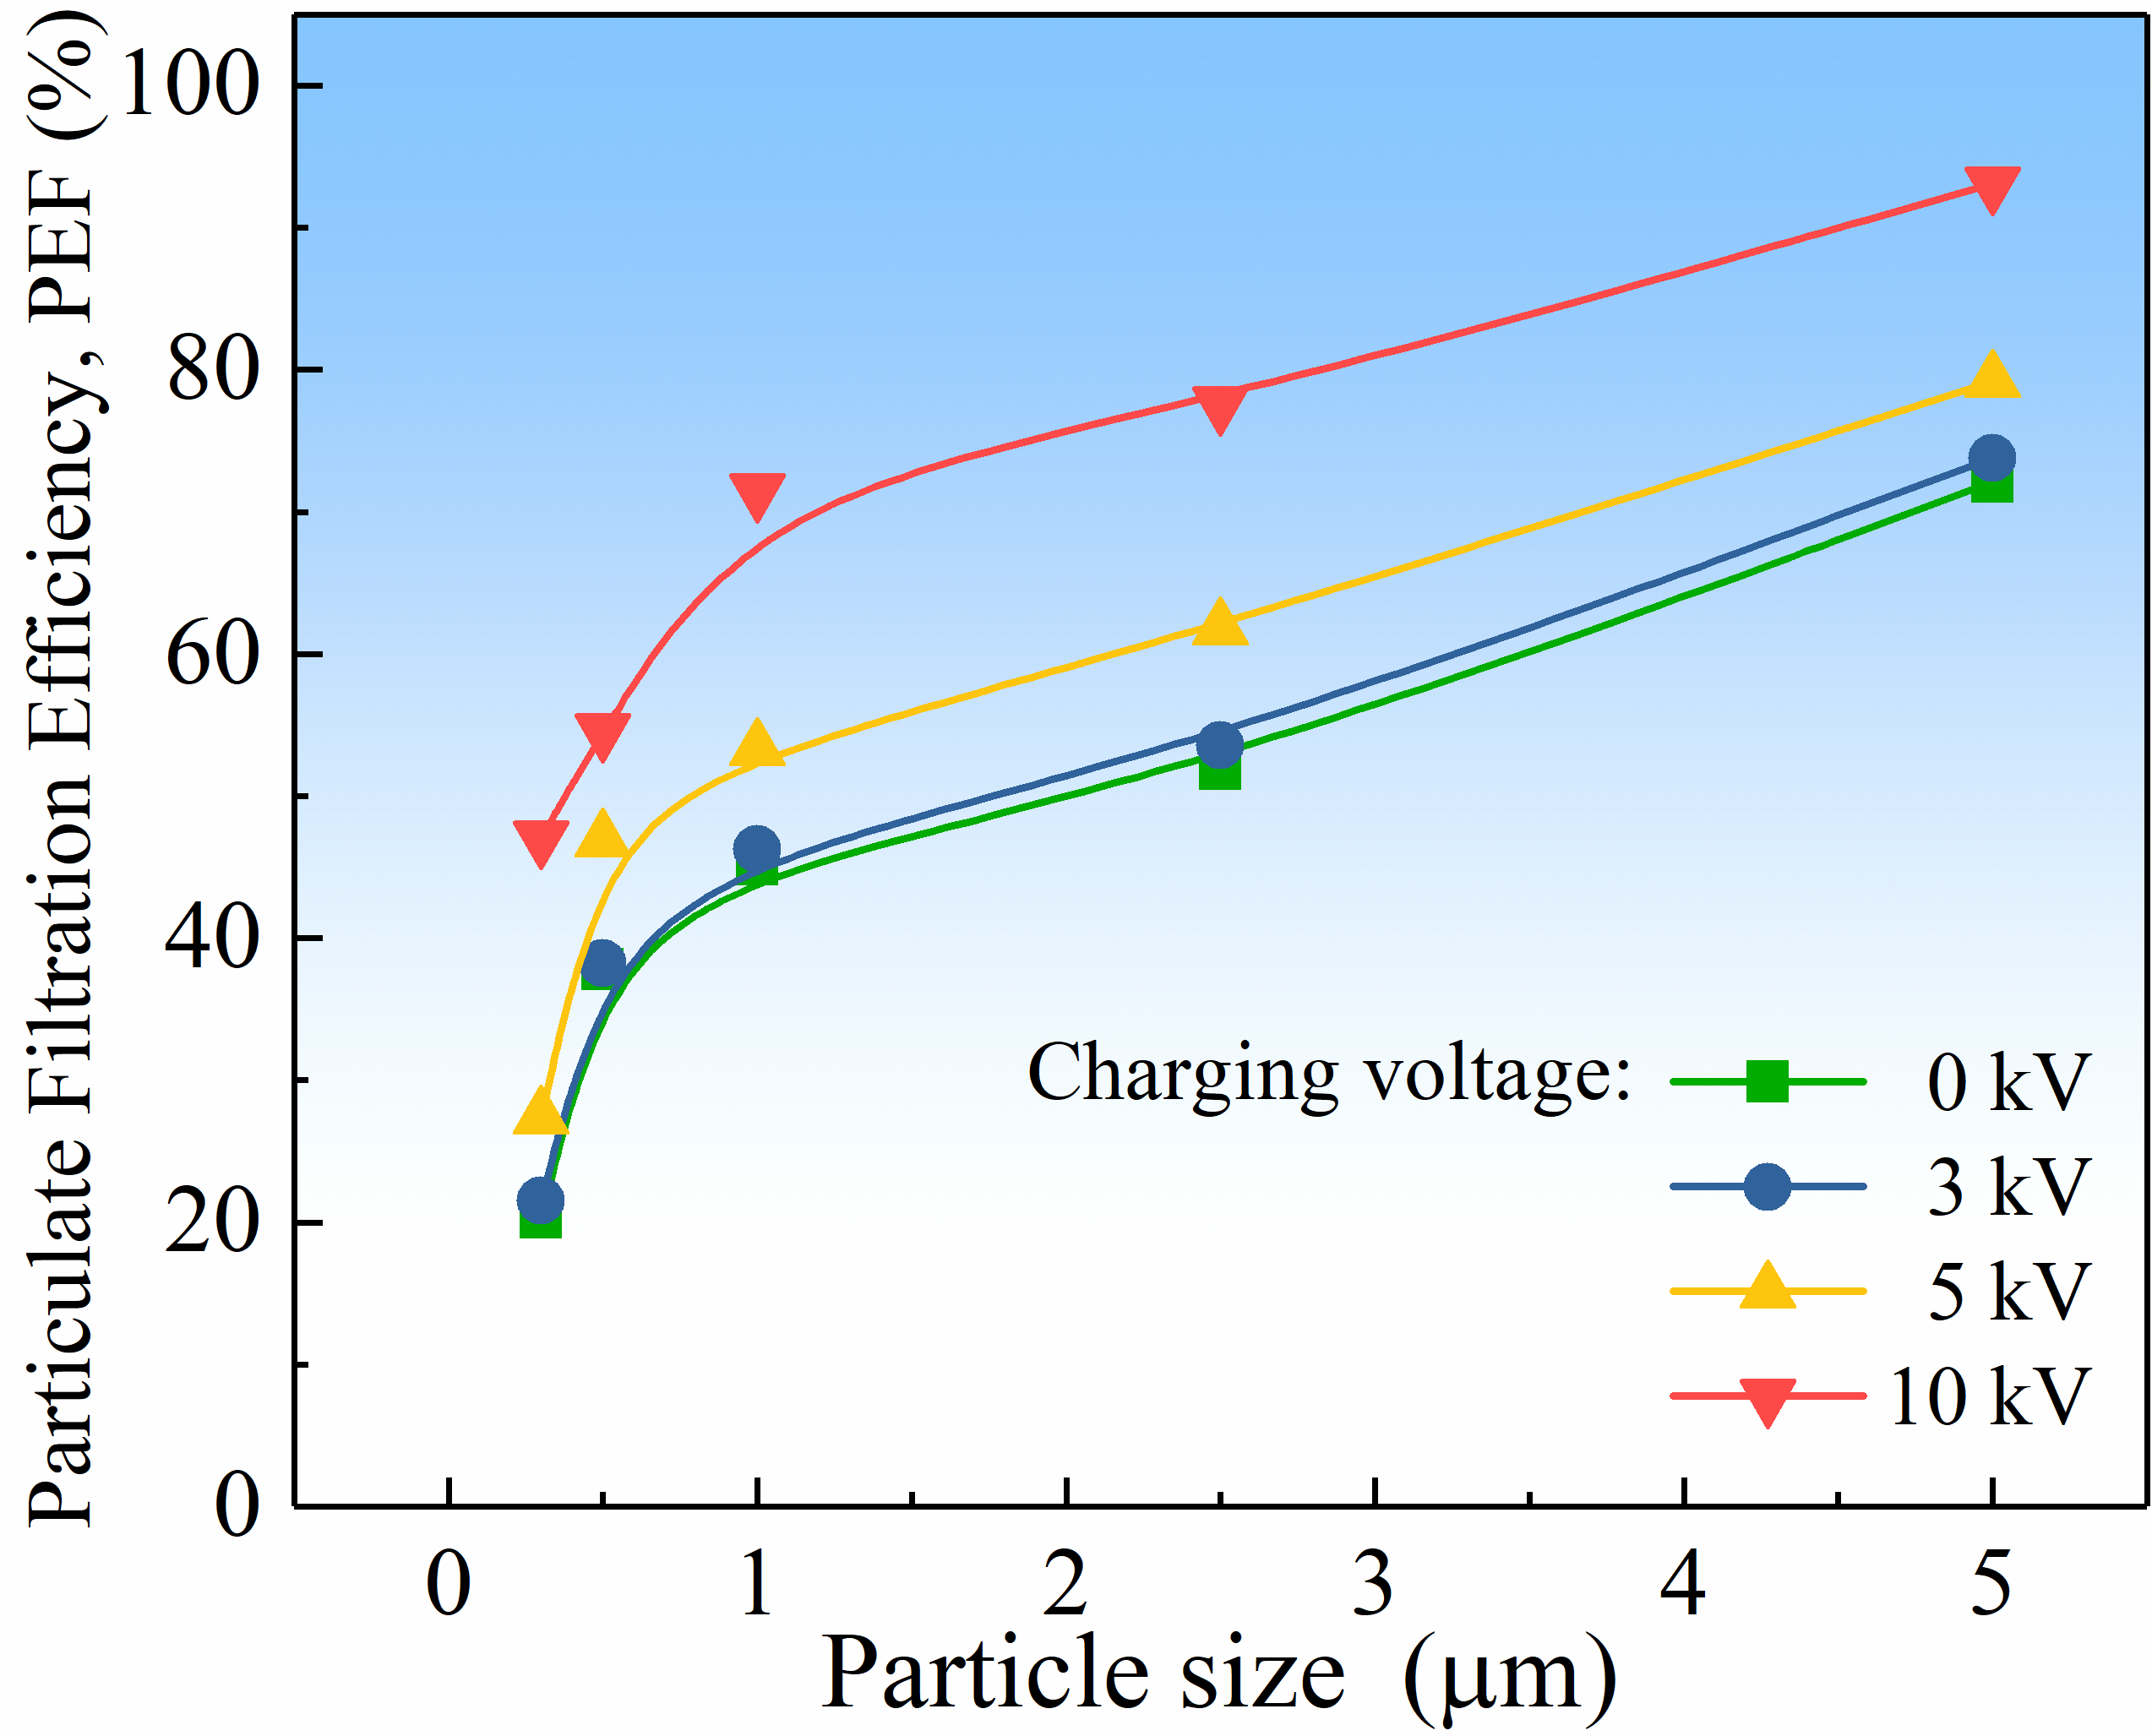
**

**Figure S7 |** Charging voltage dependent (0~10 kV) particulate filtration efficiency (PFE) of PESt coated nylon fiber membrane.
